# Supplementary material
Source: PubMed Central journal article supplement (PMC3070065)
Supplement: NIHMS268390-supplement-Supplementary_Data.pdf [file NIHMS268390-supplement-Supplementary_Data.pdf]

Supplementary Table 1. Differentially regulated proteins identified in stromal vascular fraction (SVF) cells compared to mature adipocytes isolated from both arm and abdomen adipose tissue.

| Spot Number                      | Accession Number/ Charge | Proteins/Peptide Sequence       | Number of Peptides <sup>a</sup> | Molecular Mass <sup>b</sup> | pI <sup>b</sup> | Sequence Coverage (%) | Protein Score (Mascot) | Protein Score (PLGS) |
|----------------------------------|--------------------------|---------------------------------|---------------------------------|-----------------------------|-----------------|-----------------------|------------------------|----------------------|
| <b>Up Regulated in SVF cells</b> |                          |                                 |                                 |                             |                 |                       |                        |                      |
| 507                              | P06753                   | Tropomyosin alpha-3 chain       | 3                               | 32798                       | 4.5             | 10.2                  | 145                    | 10.0                 |
|                                  | 2                        | MELQEIQLK                       |                                 |                             |                 |                       |                        |                      |
|                                  | 2                        | LVIIEGDLER                      |                                 |                             |                 |                       |                        |                      |
|                                  | 2                        | IQLVEEELDR                      |                                 |                             |                 |                       |                        |                      |
| 507                              | P67936                   | Tropomyosin alpha-4 chain       | 2                               | 28504                       | 4.5             | 9.7                   | 132                    | 10.0                 |
|                                  | 2                        | IQLVEEELDR                      |                                 |                             |                 |                       |                        |                      |
|                                  | 2                        | IQALQQQADEAEDR                  |                                 |                             |                 |                       |                        |                      |
| 614                              | P08670                   | Vimentin                        | 7                               | 53619                       | 4.9             | 15.2                  | 420                    | 12.3                 |
|                                  | 2                        | DNLAEDIMR                       |                                 |                             |                 |                       |                        |                      |
|                                  | 2                        | FADLSEAANR                      |                                 |                             |                 |                       |                        |                      |
|                                  | 2                        | VELQELNDR                       |                                 |                             |                 |                       |                        |                      |
|                                  | 2                        | ILLAELEQLK                      |                                 |                             |                 |                       |                        |                      |
|                                  | 2                        | LGDLYEEEMR                      |                                 |                             |                 |                       |                        |                      |
|                                  | 2                        | EEAENTLQSFR                     |                                 |                             |                 |                       |                        |                      |
|                                  | 2                        | VESLQEEIAFLK                    |                                 |                             |                 |                       |                        |                      |
| 614                              | P67936                   | Tropomyosin alpha-4 chain       | 1                               | 28504                       | 4.5             | 4.0                   | 53                     | 8.8                  |
|                                  | 2                        | IQLVEEELDR                      |                                 |                             |                 |                       |                        |                      |
| 1606                             | P08107                   | Heat shock 70 kDa protein 1A/1B | 2                               | 70009                       | 5.3             | 3.1                   | 91                     | 10.6                 |
|                                  | 2                        | LLQDFFNDR                       |                                 |                             |                 |                       |                        |                      |
|                                  | 2                        | NALESYAFNMK                     |                                 |                             |                 |                       |                        |                      |
| 4402                             | P60174                   | Triosephosphate isomerase       | 2                               | 26652                       | 6.5             | 12.4                  | 74                     | 10.0                 |
|                                  | 2                        | VVLAYEPMWAIGTGK                 |                                 |                             |                 |                       |                        |                      |
|                                  | 2                        | VTNGAFTGEISPGMIK                |                                 |                             |                 |                       |                        |                      |
| 7505                             | P00915                   | Carbonic anhydrase 1            | 4                               | 28852                       | 6.7             | 19.5                  | 189                    | 10.0                 |
|                                  | 2                        | VLDALQAIK                       |                                 |                             |                 |                       |                        |                      |
|                                  | 2                        | ADGLAVIGVLMK                    |                                 |                             |                 |                       |                        |                      |
|                                  | 2                        | ESISVSSEQLAQFR                  |                                 |                             |                 |                       |                        |                      |
|                                  | 2                        | LYPIANGNNQSPVDIK                |                                 |                             |                 |                       |                        |                      |
| 7511                             | P00915                   | Carbonic anhydrase 1            | 6                               | 28852                       | 6.7             | 29.9                  | 310                    | 12.3                 |
|                                  | 2                        | VLDALQAIK                       |                                 |                             |                 |                       |                        |                      |
|                                  | 2                        | GGPFSDSYR                       |                                 |                             |                 |                       |                        |                      |
|                                  | 2                        | ADGLAVIGVLMK                    |                                 |                             |                 |                       |                        |                      |
|                                  | 3                        | KHDTSLKPISVSYNPATAK             |                                 |                             |                 |                       |                        |                      |

|      |        |                                            |   |       |     |      |     |      |
|------|--------|--------------------------------------------|---|-------|-----|------|-----|------|
|      | 2      | ESISVSSEQLAQFR                             |   |       |     |      |     |      |
|      | 2      | LYPIANGNNQSPVDIK                           |   |       |     |      |     |      |
| 7522 | P00915 | Carbonic anhydrase 1                       | 3 | 28852 | 6.7 | 13.4 | 164 | 12.3 |
|      | 2      | VLDALQAIK                                  |   |       |     |      |     |      |
|      | 2      | ADGLAVIGVLMK                               |   |       |     |      |     |      |
|      | 2      | ESISVSSEQLAQFR                             |   |       |     |      |     |      |
| 7524 | P00915 | Carbonic anhydrase 1                       | 1 | 28852 | 6.7 | 5.4  | 43  | 9.7  |
|      | 2      | ESISVSSEQLAQFR                             |   |       |     |      |     |      |
| 7541 | P00915 | Carbonic anhydrase 1                       | 2 | 28852 | 6.7 | 10.0 | 63  | 10.0 |
|      | 2      | ADGLAVIGVLMK                               |   |       |     |      |     |      |
|      | 2      | ESISVSSEQLAQFR                             |   |       |     |      |     |      |
| 7541 | P23396 | 40S ribosomal protein S3                   | 1 | 26671 | 10  | 5.3  | 53  | 4.0  |
|      | 2      | ELAEDGYSGVEVR                              |   |       |     |      |     |      |
| 8231 | P62942 | Peptidyl-prolyl cis-trans isomerase FKBP1A | 1 | 11943 | 7.9 | 12.0 | 53  | N/A  |
|      | 2      | GVQVETISPGDGR                              |   |       |     |      |     |      |
| 8403 | P00918 | Carbonic anhydrase 2                       | 5 | 29227 | 7.0 | 28.5 | 336 | 10.0 |
|      | 2      | VVDVLDSIK                                  |   |       |     |      |     |      |
|      | 2      | EPISVSSEQVLK                               |   |       |     |      |     |      |
|      | 3      | ILNNGHAFNVEFDDSDQDK                        |   |       |     |      |     |      |
|      | 3      | YDPSLKPLSVSYDQATSLR                        |   |       |     |      |     |      |
|      | 2      | AVQQPDGLAVLGIFLK                           |   |       |     |      |     |      |
| 8412 | P30043 | Flavin reductase                           | 2 | 22105 | 7.9 | 14.1 | 145 | 13.0 |
|      | 2      | NDSLPTTVMSEGAR                             |   |       |     |      |     |      |
|      | 2      | TVAGQDAVIVLLGTR                            |   |       |     |      |     |      |

### Up Regulated in Adipocytes

|     |        |                           |   |       |     |      |     |      |
|-----|--------|---------------------------|---|-------|-----|------|-----|------|
| 204 | P08670 | Vimentin                  | 2 | 53619 | 4.9 | 4.9  | 149 | 10.0 |
|     | 2      | EEAENTLQSFR               |   |       |     |      |     |      |
|     | 2      | VESLQEEIAFLK              |   |       |     |      |     |      |
| 304 | P23396 | 40S ribosomal protein S3  | 5 | 26671 | 10  | 25.9 | 253 | 11.2 |
|     | 2      | AELNEFLTR                 |   |       |     |      |     |      |
|     | 2      | GLCAIAQAESLR              |   |       |     |      |     |      |
|     | 2      | ELAEDGYSGVEVR             |   |       |     |      |     |      |
|     | 2      | DEILPTTPISEQK             |   |       |     |      |     |      |
|     | 2      | GGKPEPPAMPQPVPTA          |   |       |     |      |     |      |
| 304 | P08670 | Vimentin                  | 2 | 53619 | 4.9 | 4.5  | 109 | 11.7 |
|     | 2      | ILLAELEQLK                |   |       |     |      |     |      |
|     | 2      | EEAENTLQSFR               |   |       |     |      |     |      |
| 402 | P08758 | Annexin A5                | 3 | 35914 | 4.7 | 16.6 | 238 | 10.0 |
|     | 2      | GTVTDFPGFDER              |   |       |     |      |     |      |
|     | 2      | GLGTDEESILTLLTSR          |   |       |     |      |     |      |
|     | 3      | DPDAGIDEAQVEQDAQALFQAGELK |   |       |     |      |     |      |

|      |        |                                              |   |       |     |      |     |      |
|------|--------|----------------------------------------------|---|-------|-----|------|-----|------|
| 1319 | P32119 | Peroxioredoxin-2                             | 2 | 21878 | 5.6 | 14.1 | 86  | 9.3  |
|      | 2      | QITVNDLPVGR                                  |   |       |     |      |     |      |
|      | 2      | EGGLGPLNIPLLADVTR                            |   |       |     |      |     |      |
| 1402 | P04083 | Annexin A1                                   | 3 | 38689 | 6.6 | 11.0 | 148 | 10.0 |
|      | 2      | TPAQFDADELK                                  |   |       |     |      |     |      |
|      | 2      | GVDEATIIDLTK                                 |   |       |     |      |     |      |
|      | 2      | GTDVNVFNTILTTR                               |   |       |     |      |     |      |
| 5506 | P42126 | 3,2-trans-enoyl-CoA isomerase, mitochondrial | 1 | 32795 | 8.7 | 5.0  | 68  | 10.0 |
|      | 2      | VLVEPDAGAGVAVMK                              |   |       |     |      |     |      |
| 7601 | P16930 | Fumarylacetoacetase                          | 5 | 46344 | 6.5 | 14.3 | 275 | 13.0 |
|      | 2      | LGEPIPIK                                     |   |       |     |      |     |      |
|      | 2      | HLFTGPVLSK                                   |   |       |     |      |     |      |
|      | 2      | ASSVVVSGTPIR                                 |   |       |     |      |     |      |
|      | 2      | VFLQNLLSVSQAR                                |   |       |     |      |     |      |
|      | 2      | IGVAIGDQILDLSIK                              |   |       |     |      |     |      |
| 7603 | P40925 | Malate dehydrogenase, cytoplasmic            | 1 | 36403 | 7.2 | 5.1  | 84  | 10.0 |
|      | 2      | VIVVGNPANTNCLTASK                            |   |       |     |      |     |      |
| 7603 | P04406 | Glyceraldehyde-3-phosphate dehydrogenase     | 1 | 36030 | 8.7 | 4.2  | 48  | N/A  |
|      | 2      | LVINGNPITIFQER                               |   |       |     |      |     |      |

---

<sup>a</sup>The number of unique peptides that matched with the identified protein in mass analyses.

<sup>b</sup>Molecular mass and isoelectric point (pI) are theoretical values.

Supplementary Table 2. Differentially regulated proteins identified in stromal vascular fraction (SVF) cells compared to mature adipocytes isolated from arm adipose tissue.

| Spot Number                      | Accession Number/ Charge | Proteins/Peptide Sequence                 | Number of Peptides <sup>a</sup> | Molecular Mass <sup>b</sup> | pI <sup>b</sup> | Sequence Coverage (%) | Protein Score (Mascot) | Protein Score (PLGS) |
|----------------------------------|--------------------------|-------------------------------------------|---------------------------------|-----------------------------|-----------------|-----------------------|------------------------|----------------------|
| <b>Up Regulated in SVF cells</b> |                          |                                           |                                 |                             |                 |                       |                        |                      |
| 205                              | P60660                   | Myosin light polypeptide 6                | 3                               | 16919                       | 4.4             | 27.8                  | 142                    | 10.0                 |
|                                  | 3                        | VLDFEHFLPMLQTVAK                          |                                 |                             |                 |                       |                        |                      |
|                                  | 2                        | ALGQNPTNAEVLK                             |                                 |                             |                 |                       |                        |                      |
|                                  | 2                        | DQGTIEDYVEGLR                             |                                 |                             |                 |                       |                        |                      |
| 205                              | P08670                   | Vimentin                                  | 2                               | 53619                       | 4.9             | 4.9                   | 168                    | 10.0                 |
|                                  | 2                        | EEAENTLQSFR                               |                                 |                             |                 |                       |                        |                      |
|                                  | 2                        | VESLQEEIAFLK                              |                                 |                             |                 |                       |                        |                      |
| 205                              | P30049                   | ATP synthase subunit delta, mitochondrial | 1                               | 17479                       | 5.2             | 8.3                   | 72                     | 10.0                 |
|                                  | 2                        | AQAELVGTADEATR                            |                                 |                             |                 |                       |                        |                      |
| 214                              | P08670                   | Vimentin                                  | 4                               | 53619                       | 4.9             | 9.2                   | 293                    | 10.0                 |
|                                  | 2                        | ILLAELEQLK                                |                                 |                             |                 |                       |                        |                      |
|                                  | 2                        | LGDLYEEEMR                                |                                 |                             |                 |                       |                        |                      |
|                                  | 2                        | EEAENTLQSFR                               |                                 |                             |                 |                       |                        |                      |
|                                  | 2                        | VESLQEEIAFLK                              |                                 |                             |                 |                       |                        |                      |
| 305                              | P08670                   | Vimentin                                  | 7                               | 53619                       | 4.9             | 15.0                  | 456                    | 10.0                 |
|                                  | 2                        | LQEEMLQR                                  |                                 |                             |                 |                       |                        |                      |
|                                  | 2                        | QDVDNASLAR                                |                                 |                             |                 |                       |                        |                      |
|                                  | 2                        | VELQELNDR                                 |                                 |                             |                 |                       |                        |                      |
|                                  | 2                        | ILLAELEQLK                                |                                 |                             |                 |                       |                        |                      |
|                                  | 2                        | LGDLYEEEMR                                |                                 |                             |                 |                       |                        |                      |
|                                  | 2                        | EEAENTLQSFR                               |                                 |                             |                 |                       |                        |                      |
|                                  | 2                        | VESLQEEIAFLK                              |                                 |                             |                 |                       |                        |                      |
| 306                              | P08670                   | Vimentin                                  | 4                               | 53619                       | 4.9             | 9.0                   | 204                    | 12.3                 |
|                                  | 2                        | VELQELNDR                                 |                                 |                             |                 |                       |                        |                      |
|                                  | 2                        | ILLAELEQLK                                |                                 |                             |                 |                       |                        |                      |
|                                  | 2                        | EEAENTLQSFR                               |                                 |                             |                 |                       |                        |                      |
|                                  | 2                        | VESLQEEIAFLK                              |                                 |                             |                 |                       |                        |                      |
| 309                              | P08670                   | Vimentin                                  | 6                               | 53619                       | 4.9             | 12.9                  | 376                    | 12.3                 |
|                                  | 2                        | LQEEMLQR                                  |                                 |                             |                 |                       |                        |                      |
|                                  | 2                        | DNLAEDIMR                                 |                                 |                             |                 |                       |                        |                      |
|                                  | 2                        | ILLAELEQLK                                |                                 |                             |                 |                       |                        |                      |
|                                  | 2                        | LGDLYEEEMR                                |                                 |                             |                 |                       |                        |                      |
|                                  | 2                        | EEAENTLQSFR                               |                                 |                             |                 |                       |                        |                      |

|     |             |                                            |   |       |     |      |     |      |
|-----|-------------|--------------------------------------------|---|-------|-----|------|-----|------|
| 504 | 2<br>P23396 | VESLQEEIAFLK<br>40S ribosomal protein S3   | 3 | 26671 | 10  | 14.4 | 161 | 11.1 |
|     | 2           | AELNEFLTR                                  |   |       |     |      |     |      |
|     | 2           | ELAEDGYSGVEVR                              |   |       |     |      |     |      |
|     | 2           | DEILPTTPISEQK                              |   |       |     |      |     |      |
| 504 | Q6NZI2      | Polymerase I and transcript release factor | 3 | 43449 | 5.3 | 10.8 | 192 | 12.0 |
|     | 2           | LEVNEAELLR                                 |   |       |     |      |     |      |
|     | 2           | SDQVNGVLVLSLLDK                            |   |       |     |      |     |      |
|     | 2           | QAEMEGAVQSIQGELSK                          |   |       |     |      |     |      |
| 507 | P06753      | Tropomyosin alpha-3 chain                  | 3 | 32798 | 4.5 | 10.2 | 145 | 10.0 |
|     | 2           | MELQEIQLK                                  |   |       |     |      |     |      |
|     | 2           | LVIIEGDLER                                 |   |       |     |      |     |      |
|     | 2           | IQLVEEELDR                                 |   |       |     |      |     |      |
| 507 | P67936      | Tropomyosin alpha-4 chain                  | 2 | 28504 | 4.5 | 9.7  | 132 | 10.0 |
|     | 2           | IQLVEEELDR                                 |   |       |     |      |     |      |
|     | 2           | IQALQQADEAEDR                              |   |       |     |      |     |      |
| 509 | P08670      | Vimentin                                   | 5 | 53619 | 4.9 | 11.2 | 315 | 10.0 |
|     | 2           | LQEEMLQR                                   |   |       |     |      |     |      |
|     | 2           | LGDLYEEEMR                                 |   |       |     |      |     |      |
|     | 2           | MALDIEIATYR                                |   |       |     |      |     |      |
|     | 2           | EEAENTLQSFR                                |   |       |     |      |     |      |
|     | 2           | VESLQEEIAFLK                               |   |       |     |      |     |      |
| 509 | P06753      | Tropomyosin alpha-3 chain                  | 4 | 32798 | 4.5 | 14.1 | 178 | 10.0 |
|     | 2           | MELQEIQLK                                  |   |       |     |      |     |      |
|     | 2           | LVIIEGDLER                                 |   |       |     |      |     |      |
|     | 2           | IQLVEEELDR                                 |   |       |     |      |     |      |
|     | 2           | QLEDELVSLQK                                |   |       |     |      |     |      |
| 520 | Q6NZI2      | Polymerase I and transcript release factor | 2 | 43449 | 5.3 | 8.2  | 214 | 12.0 |
|     | 2           | SDQVNGVLVLSLLDK                            |   |       |     |      |     |      |
|     | 2           | QAEMEGAVQSIQGELSK                          |   |       |     |      |     |      |
| 531 | P61981      | 14-3-3 protein gamma                       | 3 | 28284 | 4.6 | 13.8 | 198 | 10.0 |
|     | 2           | YLAEVATGEK                                 |   |       |     |      |     |      |
|     | 2           | DSTLIMQLLR                                 |   |       |     |      |     |      |
|     | 2           | NVTELNEPLSNEER                             |   |       |     |      |     |      |
| 531 | P00918      | Carbonic anhydrase 2                       | 2 | 29227 | 7.0 | 8.1  | 131 | N/A  |
|     | 2           | VLDALDSIK                                  |   |       |     |      |     |      |
|     | 2           | EPISVSSQMLK                                |   |       |     |      |     |      |
| 614 | P08670      | Vimentin                                   | 7 | 53619 | 4.9 | 15.2 | 420 | 12.3 |
|     | 2           | DNLAEDIMR                                  |   |       |     |      |     |      |
|     | 2           | FADLSEAANR                                 |   |       |     |      |     |      |
|     | 2           | VELQELNDR                                  |   |       |     |      |     |      |
|     | 2           | ILLAELEQLK                                 |   |       |     |      |     |      |
|     | 2           | LGDLYEEEMR                                 |   |       |     |      |     |      |

|      |        |                                          |    |       |     |      |     |      |
|------|--------|------------------------------------------|----|-------|-----|------|-----|------|
|      | 2      | EEAENTLQSF                               |    |       |     |      |     |      |
|      | 2      | VESLQEEIAFLK                             |    |       |     |      |     |      |
| 614  | P67936 | Tropomyosin alpha-4 chain                | 1  | 28504 | 4.5 | 4.0  | 53  | 8.8  |
|      | 2      | IQLVEEELDR                               |    |       |     |      |     |      |
| 1605 | P63267 | Actin, gamma-enteric smooth muscle       | 4  | 41849 | 5.2 | 14.6 | 196 | 8.6  |
|      | 2      | GYSFVTTAER                               |    |       |     |      |     |      |
|      | 2      | EITALAPSTMK                              |    |       |     |      |     |      |
|      | 3      | VAPEEHPTLLTEAPLNPK                       |    |       |     |      |     |      |
|      | 2      | SYELPDGQVITIGNER                         |    |       |     |      |     |      |
| 1606 | P08107 | Heat shock 70 kDa protein 1A/1B          | 2  | 70009 | 5.3 | 3.1  | 91  | 10.6 |
|      | 2      | LLQDFFNDR                                |    |       |     |      |     |      |
|      | 2      | NALESYAFNMK                              |    |       |     |      |     |      |
| 1617 | P08758 | Annexin A5                               | 5  | 35914 | 4.7 | 24.7 | 393 | 10.0 |
|      | 2      | NFATSLYSMIK                              |    |       |     |      |     |      |
|      | 2      | GTVTDFPGFDER                             |    |       |     |      |     |      |
|      | 2      | ETSGNLEQLLLAVVK                          |    |       |     |      |     |      |
|      | 2      | GLGTDEESILTLLTSR                         |    |       |     |      |     |      |
|      | 3      | DPDAGIDEAQVEQDAQALFQAGELK                |    |       |     |      |     |      |
| 1709 | P06576 | ATP synthase subunit beta, mitochondrial | 14 | 56524 | 5.1 | 38.2 | 842 | 12.3 |
|      | 2      | IGLFGGAGVVK                              |    |       |     |      |     |      |
|      | 2      | IPVGPETLGR                               |    |       |     |      |     |      |
|      | 2      | VVDLLAPYAK                               |    |       |     |      |     |      |
|      | 2      | TIAMDGTEGLVR                             |    |       |     |      |     |      |
|      | 3      | AIAELGIYPAVDPLDSTSR                      |    |       |     |      |     |      |
|      | 3      | FLSQPFQVAEVFTGHMGK                       |    |       |     |      |     |      |
|      | 2      | IMNVIGEPIDER                             |    |       |     |      |     |      |
|      | 2      | FTQAGSEVSALLGR                           |    |       |     |      |     |      |
|      | 2      | VALTGLTVAEYFR                            |    |       |     |      |     |      |
|      | 2      | TVLIMELINNVAK                            |    |       |     |      |     |      |
|      | 3      | IPSAVGYQPTLATDMGTMQER                    |    |       |     |      |     |      |
|      | 2      | VALVYGMNEPPGAR                           |    |       |     |      |     |      |
|      | 2      | LVLEVAQHLGESTVR                          |    |       |     |      |     |      |
|      | 2      | AIAELGIYPAVDPLDSTSR                      |    |       |     |      |     |      |
| 1709 | Q15084 | Protein disulfide-isomerase A6           | 1  | 48091 | 4.8 | 3.2  | 70  | 10.0 |
|      | 2      | TGEAIVDAALSALR                           |    |       |     |      |     |      |
| 2306 | P02545 | Lamin-A/C                                | 6  | 74094 | 6.6 | 8.6  | 315 | 10.0 |
|      | 2      | LQLELSK                                  |    |       |     |      |     |      |
|      | 2      | EGDLIAAQAR                               |    |       |     |      |     |      |
|      | 2      | SLETENAGLR                               |    |       |     |      |     |      |
|      | 2      | EAALSTALSEK                              |    |       |     |      |     |      |
|      | 2      | EDLQELNDR                                |    |       |     |      |     |      |
|      | 2      | ITSEEEVVS                                |    |       |     |      |     |      |

|      |        |                                            |   |        |     |      |     |      |
|------|--------|--------------------------------------------|---|--------|-----|------|-----|------|
|      | 2      | EGGLGPLNIPLLADVTR                          |   |        |     |      |     |      |
| 2705 | P60709 | Actin, cytoplasmic 1                       | 4 | 41709  | 5.1 | 17.6 | 265 | 5.1  |
|      | 2      | EITALAPSTMK                                |   |        |     |      |     |      |
|      | 3      | VAPEEHPVLLTEAPLNPK                         |   |        |     |      |     |      |
|      | 2      | SYELPDGQVITIGNER                           |   |        |     |      |     |      |
|      | 2      | DLYANTVLSGGTTMYPGIADR                      |   |        |     |      |     |      |
| 2705 | Q6NZI2 | Polymerase I and transcript release factor | 1 | 43449  | 5.3 | 3.8  | 74  | 10.0 |
|      | 2      | SDQVNGVLVLSLLDK                            |   |        |     |      |     |      |
| 3203 | P15090 | Fatty acid-binding protein, adipocyte      | 3 | 14709  | 7.0 | 36.4 | 242 | 10.0 |
|      | 2      | LVSENFDDYMK                                |   |        |     |      |     |      |
|      | 2      | STITLDGGVLVHVQK                            |   |        |     |      |     |      |
|      | 3      | NTEISFILGQEFDEVTADDRK                      |   |        |     |      |     |      |
| 3409 | P02545 | Lamin-A/C                                  | 3 | 74094  | 6.6 | 4.8  | 166 | 10.0 |
|      | 2      | SLETENAGLR                                 |   |        |     |      |     |      |
|      | 2      | EAALSTALSEK                                |   |        |     |      |     |      |
|      | 2      | ITSEEEVVS                                  |   |        |     |      |     |      |
| 3409 | P12111 | Collagen alpha-3(VI) chain                 | 1 | 343453 | 6.3 | 0.4  | 51  | N/A  |
|      | 2      | SLDEISQPAQELK                              |   |        |     |      |     |      |
| 4402 | P60174 | Triosephosphate isomerase                  | 2 | 26652  | 6.5 | 12.4 | 74  | 10.0 |
|      | 2      | VVLAYEPMWAIGTGK                            |   |        |     |      |     |      |
|      | 2      | VTNGAFTGEISPGMIK                           |   |        |     |      |     |      |
| 5202 | P15090 | Fatty acid-binding protein, adipocyte      | 4 | 14709  | 7.0 | 37.9 | 318 | 10.0 |
|      | 2      | EVGVGAFTR                                  |   |        |     |      |     |      |
|      | 2      | LVVECVMK                                   |   |        |     |      |     |      |
|      | 2      | LVSENFDDYMK                                |   |        |     |      |     |      |
|      | 3      | NTEISFILGQEFDEVTADDRK                      |   |        |     |      |     |      |
| 5207 | P15090 | Fatty acid-binding protein, adipocyte      | 2 | 14709  | 7.0 | 15.2 | 111 | 10.0 |
|      | 2      | LVVECVMK                                   |   |        |     |      |     |      |
|      | 2      | LVSENFDDYMK                                |   |        |     |      |     |      |
| 5207 | P46108 | Proto-oncogene C-crk                       | 1 | 33810  | 5.4 | 3.6  | 52  | N/A  |
|      | 2      | QEAVALLQGQR                                |   |        |     |      |     |      |
| 5217 | Q01469 | Fatty acid-binding protein, epidermal      | 2 | 15154  | 6.8 | 14.8 | 59  | 2.7  |
|      | 2      | ELGVGIALR                                  |   |        |     |      |     |      |
|      | 2      | TTQFSC TLG EK                              |   |        |     |      |     |      |
| 5406 | Q99497 | Protein DJ-1                               | 3 | 19878  | 6.4 | 29.1 | 180 | 10.0 |
|      | 2      | DVVICPDASLEDAK                             |   |        |     |      |     |      |
|      | 2      | GAEEMETVIPVDVMR                            |   |        |     |      |     |      |
|      | 3      | EGPYDVVVLPGGNLGAQNLSESAAVK                 |   |        |     |      |     |      |
| 7416 | P60174 | Triosephosphate isomerase                  | 2 | 26652  | 6.5 | 12.0 | 156 | 11.7 |
|      | 2      | QSLGELIGTLNAAK                             |   |        |     |      |     |      |
|      | 2      | VTNGAFTGEISPGMIK                           |   |        |     |      |     |      |
| 7418 | Q06830 | Peroxisomal oxidoreductin-1                | 4 | 22096  | 8.2 | 23.6 | 182 | 10.0 |
|      | 2      | TIAQDYGVLK                                 |   |        |     |      |     |      |

|      |        |                                          |   |       |     |      |     |      |
|------|--------|------------------------------------------|---|-------|-----|------|-----|------|
|      | 2      | LVQAFQFTDK                               |   |       |     |      |     |      |
|      | 2      | QITVNDLPVGR                              |   |       |     |      |     |      |
|      | 2      | QGGLGPMNIPLVSDPK                         |   |       |     |      |     |      |
| 7418 | P04179 | Superoxide dismutase [Mn], mitochondrial | 1 | 24706 | 8.4 | 6.3  | 83  | 10.0 |
|      | 2      | GDVTAQIALQPALK                           |   |       |     |      |     |      |
| 7505 | P00915 | Carbonic anhydrase 1                     | 4 | 28852 | 6.7 | 19.5 | 189 | 10.0 |
|      | 2      | VLDALQAIK                                |   |       |     |      |     |      |
|      | 2      | ADGLAVIGVLMK                             |   |       |     |      |     |      |
|      | 2      | ESISVSSEQLAQFR                           |   |       |     |      |     |      |
|      | 2      | LYPIANGNNQSPVDIK                         |   |       |     |      |     |      |
| 7507 | P04406 | Glyceraldehyde-3-phosphate dehydrogenase | 2 | 36030 | 8.7 | 8.7  | 114 | 12.3 |
|      | 2      | GALQNIIPASTGAAK                          |   |       |     |      |     |      |
|      | 2      | LIVINGNPITIFQER                          |   |       |     |      |     |      |
| 7511 | P00915 | Carbonic anhydrase 1                     | 6 | 28852 | 6.7 | 29.9 | 310 | 12.3 |
|      | 2      | VLDALQAIK                                |   |       |     |      |     |      |
|      | 2      | GGPFSDSYR                                |   |       |     |      |     |      |
|      | 2      | ADGLAVIGVLMK                             |   |       |     |      |     |      |
|      | 3      | HDTSLKPISVSYNPATAK                       |   |       |     |      |     |      |
|      | 2      | ESISVSSEQLAQFR                           |   |       |     |      |     |      |
|      | 2      | LYPIANGNNQSPVDIK                         |   |       |     |      |     |      |
| 7512 | P04406 | Glyceraldehyde-3-phosphate dehydrogenase | 2 | 36030 | 8.7 | 8.7  | 99  | 12.3 |
|      | 2      | GALQNIIPASTGAAK                          |   |       |     |      |     |      |
|      | 2      | LIVINGNPITIFQER                          |   |       |     |      |     |      |
| 7522 | P00915 | Carbonic anhydrase 1                     | 3 | 28852 | 6.7 | 13.4 | 164 | 12.3 |
|      | 2      | VLDALQAIK                                |   |       |     |      |     |      |
|      | 2      | ADGLAVIGVLMK                             |   |       |     |      |     |      |
|      | 2      | ESISVSSEQLAQFR                           |   |       |     |      |     |      |
| 7524 | P00915 | Carbonic anhydrase 1                     | 1 | 28852 | 6.7 | 5.4  | 43  | 9.7  |
|      | 2      | ESISVSSEQLAQFR                           |   |       |     |      |     |      |
| 7541 | P00915 | Carbonic anhydrase 1                     | 2 | 28852 | 6.7 | 10.0 | 63  | 10.0 |
|      | 2      | ADGLAVIGVLMK                             |   |       |     |      |     |      |
|      | 2      | ESISVSSEQLAQFR                           |   |       |     |      |     |      |
| 7541 | P23396 | 40S ribosomal protein S3                 | 1 | 26671 | 10  | 5.3  | 53  | 4.0  |
|      | 2      | ELAEDGYSGVEVR                            |   |       |     |      |     |      |
| 7706 | P04040 | Catalase                                 | 3 | 59718 | 7.0 | 7.0  | 214 | 13.0 |
|      | 2      | LVNITVGPR                                |   |       |     |      |     |      |
|      | 2      | FSTVAGESGSADTVR                          |   |       |     |      |     |      |
|      | 2      | FNTANDDNVTQVR                            |   |       |     |      |     |      |
| 7712 | P04040 | Catalase                                 | 3 | 59718 | 7.0 | 8.2  | 207 | 10.0 |
|      | 2      | ADVLTGAGNPVGDK                           |   |       |     |      |     |      |
|      | 2      | FSTVAGESGSADTVR                          |   |       |     |      |     |      |
|      | 2      | FNTANDDNVTQVR                            |   |       |     |      |     |      |
| 7713 | P04040 | Catalase                                 | 3 | 59718 | 7.0 | 7.0  | 181 | 13.0 |



|      |        |                                            |   |       |     |      |     |      |
|------|--------|--------------------------------------------|---|-------|-----|------|-----|------|
|      | 2      | LNVITVGPR                                  |   |       |     |      |     |      |
|      | 2      | FSTVAGESGSADTVR                            |   |       |     |      |     |      |
|      | 2      | FNTANDDNVTQVR                              |   |       |     |      |     |      |
| 7715 | P04040 | Catalase                                   | 4 | 59718 | 7.0 | 9.3  | 191 | 13.0 |
|      | 2      | LNVITVGPR                                  |   |       |     |      |     |      |
|      | 2      | LVNANGEAVYCK                               |   |       |     |      |     |      |
|      | 2      | FSTVAGESGSADTVR                            |   |       |     |      |     |      |
|      | 2      | FNTANDDNVTQVR                              |   |       |     |      |     |      |
| 7716 | P06733 | Alpha-enolase                              | 3 | 47139 | 7.2 | 9.7  | 193 | 10.0 |
|      | 2      | GNPTVEVDLFTSK                              |   |       |     |      |     |      |
|      | 2      | VVIGMDVAASEFFR                             |   |       |     |      |     |      |
|      | 2      | VNQIGSVTESLQACK                            |   |       |     |      |     |      |
| 8212 | P62937 | Peptidyl-prolyl cis-trans isomerase A      | 2 | 17887 | 8.5 | 12.2 | 104 | 10.2 |
|      | 2      | VSFELFADK                                  |   |       |     |      |     |      |
|      | 2      | EGMNIVEAMER                                |   |       |     |      |     |      |
| 8231 | P62942 | Peptidyl-prolyl cis-trans isomerase FKBP1A | 1 | 11943 | 7.9 | 12.0 | 53  | N/A  |
|      | 2      | GVQVETISPGDGR                              |   |       |     |      |     |      |
| 8403 | P00918 | Carbonic anhydrase 2                       | 5 | 29227 | 7.0 | 28.5 | 336 | 10.0 |
|      | 2      | VVDVLDSIK                                  |   |       |     |      |     |      |
|      | 2      | EPISVSSEQVLK                               |   |       |     |      |     |      |
|      | 3      | ILNNGHAFNVEFDDSQDK                         |   |       |     |      |     |      |
|      | 3      | YDPSLKPLSVSYDQATSLR                        |   |       |     |      |     |      |
|      | 2      | AVQQPDGLAVLGIFLK                           |   |       |     |      |     |      |
| 8412 | P30043 | Flavin reductase                           | 2 | 22105 | 7.9 | 14.1 | 145 | 13.0 |
|      | 2      | NDLSPPTVMSEGAR                             |   |       |     |      |     |      |
|      | 2      | TVAGQDAVIVLLGTR                            |   |       |     |      |     |      |
| 8422 | Q06830 | Peroxioredoxin-1                           | 4 | 22096 | 8.2 | 21.1 | 177 | 10.0 |
|      | 2      | TIAQDYGVVK                                 |   |       |     |      |     |      |
|      | 2      | LVQAFQFTDK                                 |   |       |     |      |     |      |
|      | 2      | QITVNDLPVGR                                |   |       |     |      |     |      |
|      | 2      | ATAVMPDGQFK                                |   |       |     |      |     |      |
| 8608 | P04406 | Glyceraldehyde-3-phosphate dehydrogenase   | 3 | 36030 | 8.7 | 12.8 | 194 | 10.0 |
|      | 2      | GALQNIIPASTGAAK                            |   |       |     |      |     |      |
|      | 2      | VPTANVSVDLTCR                              |   |       |     |      |     |      |
|      | 2      | LVINGNPITIFQER                             |   |       |     |      |     |      |
| 8609 | P00558 | Phosphoglycerate kinase 1                  | 5 | 44586 | 10  | 18.9 | 320 | 10.0 |
|      | 2      | IQLINNMLDK                                 |   |       |     |      |     |      |
|      | 3      | ITLPVDFVTADKFDENAK                         |   |       |     |      |     |      |
|      | 2      | VNEMIIGGGMAFTFLK                           |   |       |     |      |     |      |
|      | 2      | ACANPAAGSVILLENLR                          |   |       |     |      |     |      |
|      | 2      | VLNNMEIGTSLFDEEGAK                         |   |       |     |      |     |      |
| 8609 | P00918 | Carbonic anhydrase 2                       | 1 | 29227 | 7.0 | 6.2  | 41  | 5.7  |
|      | 2      | AVQQPDGLAVLGIFLK                           |   |       |     |      |     |      |

|      |        |                          |   |       |    |     |    |      |
|------|--------|--------------------------|---|-------|----|-----|----|------|
| 8615 | P23396 | 40S ribosomal protein S3 | 1 | 26671 | 10 | 5.8 | 55 | 10.0 |
|      | 2      | FGFPEGSVELYAEK           |   |       |    |     |    |      |

**Up Regulated in Adipocytes**

|      |        |                            |   |        |     |      |     |      |
|------|--------|----------------------------|---|--------|-----|------|-----|------|
| 204  | P08670 | Vimentin                   | 2 | 53619  | 4.9 | 4.9  | 149 | 10.0 |
|      | 2      | EEAENTLQSFR                |   |        |     |      |     |      |
|      | 2      | VESLQEEIAFLK               |   |        |     |      |     |      |
| 219  | P08670 | Vimentin                   | 2 | 53619  | 4.9 | 5.2  | 109 | 10.0 |
|      | 2      | MALDIEIATYR                |   |        |     |      |     |      |
|      | 2      | QVQSLTCEVDALK              |   |        |     |      |     |      |
| 304  | P23396 | 40S ribosomal protein S3   | 5 | 26671  | 10  | 25.9 | 253 | 11.2 |
|      | 2      | AELNEFLTR                  |   |        |     |      |     |      |
|      | 2      | GLCAIAQAESLR               |   |        |     |      |     |      |
|      | 2      | ELAEDGYSGVEVR              |   |        |     |      |     |      |
|      | 2      | DEILPTTPISEQK              |   |        |     |      |     |      |
|      | 2      | GGKPEPPAMPQPVPTA           |   |        |     |      |     |      |
| 304  | P08670 | Vimentin                   | 2 | 53619  | 4.9 | 4.5  | 109 | 11.7 |
|      | 2      | ILLAELEQLK                 |   |        |     |      |     |      |
|      | 2      | EEAENTLQSFR                |   |        |     |      |     |      |
| 402  | P08758 | Annexin A5                 | 3 | 35914  | 4.7 | 16.6 | 238 | 10.0 |
|      | 2      | GTVTDFPGFDER               |   |        |     |      |     |      |
|      | 2      | GLGTDEESILTLTTSR           |   |        |     |      |     |      |
|      | 3      | DPDAGIDEAQVEQDAQALFQAGELK  |   |        |     |      |     |      |
| 405  | P08758 | Annexin A5                 | 1 | 35914  | 4.7 | 5.0  | 67  | 0.0  |
|      | 2      | GLGTDEESILTLTTSR           |   |        |     |      |     |      |
| 1307 | P12111 | Collagen alpha-3(VI) chain | 2 | 343453 | 6.3 | 0.9  | 108 | N/A  |
|      | 2      | SLDEISQPAQELK              |   |        |     |      |     |      |
|      | 2      | AAPLQGMLPGLLAPLR           |   |        |     |      |     |      |
| 1314 | P04083 | Annexin A1                 | 5 | 38689  | 6.6 | 20.2 | 350 | 10.0 |
|      | 2      | DITSDTSGDFR                |   |        |     |      |     |      |
|      | 2      | GVDEATIIDILTK              |   |        |     |      |     |      |
|      | 2      | GTDVNVFNTILTTR             |   |        |     |      |     |      |
|      | 2      | GLGTDEDTLIEILASR           |   |        |     |      |     |      |
|      | 2      | SEDFGVNEDLADSDAR           |   |        |     |      |     |      |
| 1319 | P32119 | Peroxioredoxin-2           | 2 | 21878  | 5.6 | 14.1 | 86  | 9.3  |
|      | 2      | QITVNDLPVGR                |   |        |     |      |     |      |
|      | 2      | EGGLGPLNIPLADVTR           |   |        |     |      |     |      |
| 1402 | P04083 | Annexin A1                 | 3 | 38689  | 6.6 | 11.0 | 148 | 10.0 |
|      | 2      | TPAQFDADELK                |   |        |     |      |     |      |
|      | 2      | GVDEATIIDILTK              |   |        |     |      |     |      |
|      | 2      | GTDVNVFNTILTTR             |   |        |     |      |     |      |
| 1507 | P60709 | Actin, cytoplasmic 1       | 3 | 41709  | 5.1 | 12.0 | 204 | 9.3  |

|      |        |                                              |   |       |     |      |     |      |
|------|--------|----------------------------------------------|---|-------|-----|------|-----|------|
|      | 2      | ELTALAPSTMK                                  |   |       |     |      |     |      |
|      | 3      | VAPEEHPVLLTEAPLNPK                           |   |       |     |      |     |      |
|      | 2      | SYELPDGQVITIGNER                             |   |       |     |      |     |      |
| 1507 | P08758 | Annexin A5                                   | 2 | 35914 | 4.7 | 9.7  | 198 | 10.0 |
|      | 2      | ETSGNLEQLLLAVVK                              |   |       |     |      |     |      |
|      | 2      | GLGTDEESILTLLTSR                             |   |       |     |      |     |      |
| 1508 | P00918 | Carbonic anhydrase 2                         | 2 | 29227 | 7.0 | 8.1  | 62  | N/A  |
|      | 2      | VLDALDSIK                                    |   |       |     |      |     |      |
|      | 2      | EPISVSSQQLK                                  |   |       |     |      |     |      |
| 2303 | P06576 | ATP synthase subunit beta, mitochondrial     | 2 | 56524 | 5.1 | 4.9  | 39  | 1.7  |
|      | 2      | VALTGLTVAEYFR                                |   |       |     |      |     |      |
|      | 2      | TVLIMELINNVAK                                |   |       |     |      |     |      |
| 2405 | P23396 | 40S ribosomal protein S3                     | 1 | 26671 | 10  | 5.3  | 66  | N/A  |
|      | 2      | ELAEDGYSGVEVR                                |   |       |     |      |     |      |
| 3201 | P07355 | Annexin A2                                   | 2 | 38579 | 7.8 | 7.4  | 150 | 10.0 |
|      | 2      | TPAQYDASELK                                  |   |       |     |      |     |      |
|      | 2      | GVDEVTIVNILTNR                               |   |       |     |      |     |      |
| 3506 | P35232 | Prohibitin                                   | 2 | 24393 | 6.9 | 8.1  | 73  | 11.4 |
|      | 2      | FDAGELITQR                                   |   |       |     |      |     |      |
|      | 2      | AAELIANSLATAGDGLIELR                         |   |       |     |      |     |      |
| 3506 | P07355 | Annexin A2                                   | 1 | 38579 | 7.8 | 4.1  | 43  | 10.0 |
|      | 2      | GVDEVTIVNILTNR                               |   |       |     |      |     |      |
| 3706 | P63267 | Actin, gamma-enteric smooth muscle           | 2 | 41849 | 5.2 | 7.7  | 92  | 8.6  |
|      | 2      | EITALAPSTMK                                  |   |       |     |      |     |      |
|      | 3      | VAPEEHPTLLTEAPLNPK                           |   |       |     |      |     |      |
| 4404 | P63104 | 14-3-3 protein zeta/delta                    | 2 | 27727 | 4.5 | 9.0  | 104 | 3.7  |
|      | 2      | DSTLIMQLLR                                   |   |       |     |      |     |      |
|      | 2      | DICNDVLSLEK                                  |   |       |     |      |     |      |
| 4622 | P23396 | 40S ribosomal protein S3                     | 3 | 26671 | 10  | 14.4 | 157 | 10.6 |
|      | 2      | AELNEFLTR                                    |   |       |     |      |     |      |
|      | 2      | ELAEDGYSGVEVR                                |   |       |     |      |     |      |
|      | 2      | DEILPTTPISEQK                                |   |       |     |      |     |      |
| 5506 | P42126 | 3,2-trans-enoyl-CoA isomerase, mitochondrial | 1 | 32795 | 8.7 | 5.0  | 68  | 10.0 |
|      | 2      | VLVEPDAGAGVAVMK                              |   |       |     |      |     |      |
| 6310 | P02511 | Alpha-crystallin B chain                     | 2 | 20159 | 6.4 | 10.9 | 24  | 13.0 |
|      | 2      | HFSPEELK                                     |   |       |     |      |     |      |
|      | 2      | VLGDMVEIHGK                                  |   |       |     |      |     |      |
| 7601 | P16930 | Fumarylacetoacetase                          | 5 | 46344 | 6.5 | 14.3 | 275 | 13.0 |
|      | 2      | LGEPIPIK                                     |   |       |     |      |     |      |
|      | 2      | HLFTGPVLSK                                   |   |       |     |      |     |      |
|      | 2      | ASSVVVSGTPIR                                 |   |       |     |      |     |      |
|      | 2      | VFLQNLLSVSQAR                                |   |       |     |      |     |      |
|      | 2      | IGVAIGDQILDLSIIK                             |   |       |     |      |     |      |

|      |        |                                                            |   |       |     |     |    |      |
|------|--------|------------------------------------------------------------|---|-------|-----|-----|----|------|
| 7603 | P40925 | Malate dehydrogenase, cytoplasmic<br>VIVVGNPANTNCLTASK     | 1 | 36403 | 7.2 | 5.1 | 84 | 10.0 |
| 7603 | P04406 | Glyceraldehyde-3-phosphate dehydrogenase<br>LVINGNPITIFQER | 1 | 36030 | 8.7 | 4.2 | 48 | N/A  |

---

<sup>a</sup>The number of unique peptides that matched with the identified protein in mass analyses.

<sup>b</sup>Molecular mass and isoelectric point (pI) are theoretical values.

Supplementary Table 3. Differentially regulated proteins identified in stromal vascular fraction (SVF) cells compared to mature adipocytes isolated from abdomen adipose tissue.

| Spot Number                      | Accession Number/<br>Charge | Proteins/Peptide Sequence                  | Number of Peptides <sup>a</sup> | Molecular Mass <sup>b</sup> | pI <sup>b</sup> | Sequence Coverage (%) | Protein Score (Mascot) | Protein Score (PLGS) |
|----------------------------------|-----------------------------|--------------------------------------------|---------------------------------|-----------------------------|-----------------|-----------------------|------------------------|----------------------|
| <b>Up Regulated in SVF cells</b> |                             |                                            |                                 |                             |                 |                       |                        |                      |
| 4402                             | P60174                      | Triosephosphate isomerase                  | 2                               | 26652                       | 6.5             | 12.4                  | 74                     | 10.0                 |
|                                  | 2                           | VVLAYEPMWAIGTGK                            |                                 |                             |                 |                       |                        |                      |
|                                  | 2                           | VTNGAFTGEISPGMIK                           |                                 |                             |                 |                       |                        |                      |
| 7505                             | P00915                      | Carbonic anhydrase 1                       | 4                               | 28852                       | 6.7             | 19.5                  | 189                    | 10.0                 |
|                                  | 2                           | VLDALQAIK                                  |                                 |                             |                 |                       |                        |                      |
|                                  | 2                           | ADGLAVIGVLMK                               |                                 |                             |                 |                       |                        |                      |
|                                  | 2                           | ESISVSSEQLAQFR                             |                                 |                             |                 |                       |                        |                      |
|                                  | 2                           | LYPIANGNNQSPVDIK                           |                                 |                             |                 |                       |                        |                      |
| 7511                             | P00915                      | Carbonic anhydrase 1                       | 6                               | 28852                       | 6.7             | 29.9                  | 310                    | 12.3                 |
|                                  | 2                           | VLDALQAIK                                  |                                 |                             |                 |                       |                        |                      |
|                                  | 2                           | GGPFSDSYR                                  |                                 |                             |                 |                       |                        |                      |
|                                  | 2                           | ADGLAVIGVLMK                               |                                 |                             |                 |                       |                        |                      |
|                                  | 3                           | HDTSLKPISVSYNPATAK                         |                                 |                             |                 |                       |                        |                      |
|                                  | 2                           | ESISVSSEQLAQFR                             |                                 |                             |                 |                       |                        |                      |
|                                  | 2                           | LYPIANGNNQSPVDIK                           |                                 |                             |                 |                       |                        |                      |
| 7524                             | P00915                      | Carbonic anhydrase 1                       | 1                               | 28852                       | 6.7             | 5.4                   | 43                     | 9.7                  |
|                                  | 2                           | ESISVSSEQLAQFR                             |                                 |                             |                 |                       |                        |                      |
| 7541                             | P00915                      | Carbonic anhydrase 1                       | 2                               | 28852                       | 6.7             | 10.0                  | 63                     | 10.0                 |
|                                  | 2                           | ADGLAVIGVLMK                               |                                 |                             |                 |                       |                        |                      |
|                                  | 2                           | ESISVSSEQLAQFR                             |                                 |                             |                 |                       |                        |                      |
| 7541                             | P23396                      | 40S ribosomal protein S3                   | 1                               | 26671                       | 10              | 5.3                   | 53                     | 4.0                  |
|                                  | 2                           | ELAEDGYSGVEVR                              |                                 |                             |                 |                       |                        |                      |
| 8231                             | P62942                      | Peptidyl-prolyl cis-trans isomerase FKBP1A | 1                               | 11943                       | 7.9             | 12.0                  | 53                     | N/A                  |
|                                  | 2                           | GVQVETISPGDGR                              |                                 |                             |                 |                       |                        |                      |
| 8403                             | P00918                      | Carbonic anhydrase 2                       | 5                               | 29227                       | 7.0             | 28.5                  | 336                    | 10.0                 |
|                                  | 2                           | VVDVLDSIK                                  |                                 |                             |                 |                       |                        |                      |
|                                  | 2                           | EPISVSSEQVLK                               |                                 |                             |                 |                       |                        |                      |
|                                  | 3                           | ILNNGHAFNVEFDDSDQDK                        |                                 |                             |                 |                       |                        |                      |
|                                  | 3                           | YDPSLKPLSVSYDQATSLR                        |                                 |                             |                 |                       |                        |                      |
|                                  | 2                           | AVQQPDGLAVLGIFLK                           |                                 |                             |                 |                       |                        |                      |

### Up Regulated in Adipocytes

|      |        |                                          |    |       |     |      |     |      |
|------|--------|------------------------------------------|----|-------|-----|------|-----|------|
| 204  | P08670 | Vimentin                                 | 2  | 53619 | 4.9 | 4.9  | 149 | 10.0 |
|      | 2      | EEAENTLQSFRR                             |    |       |     |      |     |      |
|      | 2      | VESLQEEIAFLK                             |    |       |     |      |     |      |
| 309  | P08670 | Vimentin                                 | 6  | 53619 | 4.9 | 12.9 | 376 | 12.3 |
|      | 2      | LQEEMLQR                                 |    |       |     |      |     |      |
|      | 2      | DNLAEDIMR                                |    |       |     |      |     |      |
|      | 2      | ILLAELEQLK                               |    |       |     |      |     |      |
|      | 2      | LGDLYEEEMR                               |    |       |     |      |     |      |
|      | 2      | EEAENTLQSFRR                             |    |       |     |      |     |      |
|      | 2      | VESLQEEIAFLK                             |    |       |     |      |     |      |
| 1319 | P32119 | Peroxiredoxin-2                          | 2  | 21878 | 5.6 | 14.1 | 86  | 9.3  |
|      | 2      | QITVNDLPVGR                              |    |       |     |      |     |      |
|      | 2      | EGGLGPLNIPLLDVTR                         |    |       |     |      |     |      |
| 1402 | P04083 | Annexin A1                               | 3  | 38689 | 6.6 | 11.0 | 148 | 10.0 |
|      | 2      | TPAQFDADELRR                             |    |       |     |      |     |      |
|      | 2      | GVDEATHIDILTK                            |    |       |     |      |     |      |
|      | 2      | GTDVNVFNTILTTR                           |    |       |     |      |     |      |
| 1617 | P08758 | Annexin A5                               | 5  | 35914 | 4.7 | 24.7 | 393 | 10.0 |
|      | 2      | NFATSLYSMIK                              |    |       |     |      |     |      |
|      | 2      | GTVTDFPGFDER                             |    |       |     |      |     |      |
|      | 2      | ETSGNLEQLLLAVVK                          |    |       |     |      |     |      |
|      | 2      | GLGTDEESILTLLTSR                         |    |       |     |      |     |      |
|      | 3      | DPDAGIDEAQVEQDAQALFQAGELK                |    |       |     |      |     |      |
| 1709 | P06576 | ATP synthase subunit beta, mitochondrial | 14 | 56524 | 5.1 | 38.2 | 842 | 12.3 |
|      | 2      | IGLFGGAGVGGK                             |    |       |     |      |     |      |
|      | 2      | IPVGPETLGR                               |    |       |     |      |     |      |
|      | 2      | VVDLLAPYAK                               |    |       |     |      |     |      |
|      | 2      | TIAMDGTEGLVR                             |    |       |     |      |     |      |
|      | 3      | AIAELGIYPAVDPLDSTSR                      |    |       |     |      |     |      |
|      | 3      | FLSQPFQVAEVFTGHMGK                       |    |       |     |      |     |      |
|      | 2      | IMNVIGEPIDER                             |    |       |     |      |     |      |
|      | 2      | FTQAGSEVSALLGR                           |    |       |     |      |     |      |
|      | 2      | VALTGLTVAEYFR                            |    |       |     |      |     |      |
|      | 2      | TVLIMELINNVAK                            |    |       |     |      |     |      |
|      | 3      | IPSAVGYQPTLATDMGTMQER                    |    |       |     |      |     |      |
|      | 2      | VALVYGQMNEPPGAR                          |    |       |     |      |     |      |
|      | 2      | LVLEVAQHLGESTVR                          |    |       |     |      |     |      |
|      | 2      | AIAELGIYPAVDPLDSTSR                      |    |       |     |      |     |      |
| 1709 | Q15084 | Protein disulfide-isomerase A6           | 1  | 48091 | 4.8 | 3.2  | 70  | 10.0 |
|      | 2      | TGEAIVDAALSALR                           |    |       |     |      |     |      |
| 5202 | P15090 | Fatty acid-binding protein, adipocyte    | 4  | 14709 | 7.0 | 37.9 | 318 | 10.0 |

|      |        |                                              |   |       |     |      |     |      |
|------|--------|----------------------------------------------|---|-------|-----|------|-----|------|
|      | 2      | EVGVGFATR                                    |   |       |     |      |     |      |
|      | 2      | LVVECVMK                                     |   |       |     |      |     |      |
|      | 2      | LVSENFDDYMK                                  |   |       |     |      |     |      |
|      | 3      | NTEISFILGQEFDEVTADDRK                        |   |       |     |      |     |      |
| 5506 | P42126 | 3,2-trans-enoyl-CoA isomerase, mitochondrial | 1 | 32795 | 8.7 | 5.0  | 68  | 10.0 |
|      | 2      | VLVEPDAGAGVAVMK                              |   |       |     |      |     |      |
| 7416 | P60174 | Triosephosphate isomerase                    | 2 | 26652 | 6.5 | 12.0 | 156 | 11.7 |
|      | 2      | QSLGELIGTLNAAK                               |   |       |     |      |     |      |
|      | 2      | VTNGAFTGEISPGMIK                             |   |       |     |      |     |      |
| 7601 | P16930 | Fumarylacetoacetase                          | 5 | 46344 | 6.5 | 14.3 | 275 | 13.0 |
|      | 2      | LGEPIPIK                                     |   |       |     |      |     |      |
|      | 2      | HLFTGPVLSK                                   |   |       |     |      |     |      |
|      | 2      | ASSVVVSGTPIR                                 |   |       |     |      |     |      |
|      | 2      | VFLQNLLSVSQAR                                |   |       |     |      |     |      |
|      | 2      | IGVAIGDQILDLSIIK                             |   |       |     |      |     |      |
| 7713 | P04040 | Catalase                                     | 3 | 59718 | 7.0 | 7.0  | 181 | 13.0 |
|      | 2      | LNVITVGPR                                    |   |       |     |      |     |      |
|      | 2      | FSTVAGESGSADTVR                              |   |       |     |      |     |      |
|      | 2      | FNTANDDNVTQVR                                |   |       |     |      |     |      |
| 7716 | P06733 | Alpha-enolase                                | 3 | 47139 | 7.2 | 9.7  | 193 | 10.0 |
|      | 2      | GNPTVEVDLFTSK                                |   |       |     |      |     |      |
|      | 2      | VVIGMDVAASEFFR                               |   |       |     |      |     |      |
|      | 2      | VNQIGSVTESLQACK                              |   |       |     |      |     |      |
| 8608 | P04406 | Glyceraldehyde-3-phosphate dehydrogenase     | 3 | 36030 | 8.7 | 12.8 | 194 | 10.0 |
|      | 2      | GALQNIIPASTGAAK                              |   |       |     |      |     |      |
|      | 2      | VPTANVSVVDLTCR                               |   |       |     |      |     |      |
|      | 2      | LVINGNPITIFQER                               |   |       |     |      |     |      |
| 8615 | P23396 | 40S ribosomal protein S3                     | 1 | 26671 | 10  | 5.8  | 55  | 10.0 |
|      | 2      | FGFPEGSVELYAEK                               |   |       |     |      |     |      |

<sup>a</sup>The number of unique peptides that matched with the identified protein in mass analyses.

<sup>b</sup>Molecular mass and isoelectric point (pI) are theoretical values.

Supplementary Table 4. Tandem mass spectra and peptide sequences of proteins identified using single peptides.

Spot 7524

P00915 Carbonic anhydrase 1

790.8600 m/z (z = +2), Mass error (ppm) = -49.84, Mascot score = 43

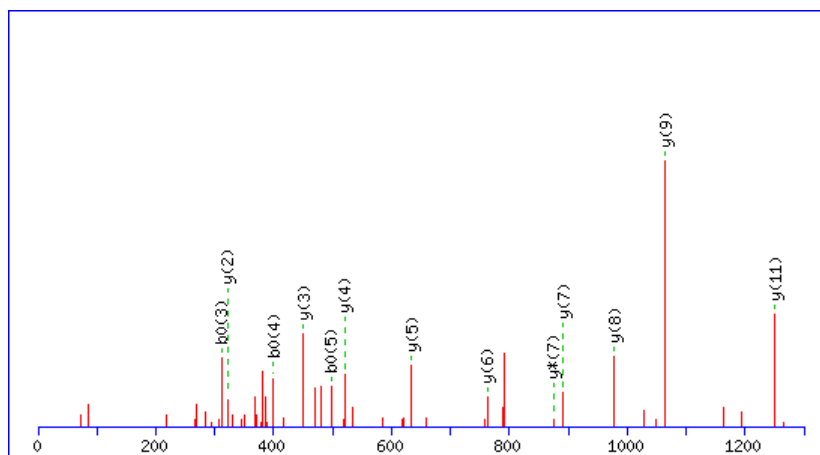

| #  | b         | b <sup>++</sup> | b <sup>*</sup> | b <sup>+++</sup> | b <sup>0</sup>  | b <sup>0++</sup> | Seq. | y                | y <sup>++</sup> | y <sup>*</sup>  | y <sup>+++</sup> | y <sup>0</sup> | y <sup>0++</sup> | #  |
|----|-----------|-----------------|----------------|------------------|-----------------|------------------|------|------------------|-----------------|-----------------|------------------|----------------|------------------|----|
| 1  | 130.0499  | 65.5286         |                |                  | 112.0393        | 56.5233          | E    |                  |                 |                 |                  |                |                  | 14 |
| 2  | 217.0819  | 109.0446        |                |                  | 199.0713        | 100.0393         | S    | 1451.7489        | 726.3781        | 1434.7223       | 717.8648         | 1433.7383      | 717.3728         | 13 |
| 3  | 330.1660  | 165.5866        |                |                  | <b>312.1554</b> | 156.5813         | I    | 1364.7169        | 682.8621        | 1347.6903       | 674.3488         | 1346.7063      | 673.8568         | 12 |
| 4  | 417.1980  | 209.1026        |                |                  | <b>399.1874</b> | 200.0973         | S    | <b>1251.6328</b> | 626.3200        | 1234.6062       | 617.8068         | 1233.6222      | 617.3148         | 11 |
| 5  | 516.2664  | 258.6368        |                |                  | <b>498.2558</b> | 249.6316         | V    | 1164.6008        | 582.8040        | 1147.5742       | 574.2907         | 1146.5902      | 573.7987         | 10 |
| 6  | 603.2984  | 302.1529        |                |                  | 585.2879        | 293.1476         | S    | <b>1065.5323</b> | 533.2698        | 1048.5058       | 524.7565         | 1047.5218      | 524.2645         | 9  |
| 7  | 690.3305  | 345.6689        |                |                  | 672.3199        | 336.6636         | S    | <b>978.5003</b>  | 489.7538        | 961.4738        | 481.2405         | 960.4898       | 480.7485         | 8  |
| 8  | 819.3731  | 410.1902        |                |                  | 801.3625        | 401.1849         | E    | <b>891.4683</b>  | 446.2378        | <b>874.4417</b> | 437.7245         | 873.4577       | 437.2325         | 7  |
| 9  | 947.4316  | 474.2195        | 930.4051       | 465.7062         | 929.4211        | 465.2142         | Q    | <b>762.4257</b>  | 381.7165        | 745.3992        | 373.2032         |                |                  | 6  |
| 10 | 1060.5157 | 530.7615        | 1043.4891      | 522.2482         | 1042.5051       | 521.7562         | L    | <b>634.3671</b>  | 317.6872        | 617.3406        | 309.1739         |                |                  | 5  |
| 11 | 1131.5528 | 566.2800        | 1114.5263      | 557.7668         | 1113.5422       | 557.2748         | A    | <b>521.2831</b>  | 261.1452        | 504.2565        | 252.6319         |                |                  | 4  |
| 12 | 1259.6114 | 630.3093        | 1242.5848      | 621.7961         | 1241.6008       | 621.3040         | Q    | <b>450.2459</b>  | 225.6266        | 433.2194        | 217.1133         |                |                  | 3  |
| 13 | 1406.6798 | 703.8435        | 1389.6533      | 695.3303         | 1388.6692       | 694.8383         | F    | <b>322.1874</b>  | 161.5973        | 305.1608        | 153.0840         |                |                  | 2  |
| 14 |           |                 |                |                  |                 |                  | R    | 175.1190         | 88.0631         | 158.0924        | 79.5498          |                |                  | 1  |

**Monoisotopic mass of neutral peptide Mr(calc): 1579.7842**

**Ions Score: 43 Expect: 0.031**

**Matches : 13/128 fragment ions using 31 most intense peaks**

Matched peptides shown in **Bold Red**

1 MASPDWGYDD KNGPEQWSKL YPIANGNNQS PVDIKTSETK HDTSLKPISV  
51 SYNPAKAIK INVGHFSFHVN FEDNDNRSVL KGGPFSDSYR LQFHFHWGS  
101 TNEHGSEHTV DGVKYSALH VAHWNSAKYS SLAEAASKAD GLAVIGVLMK  
151 VGEANPKLQK VLDALQAIKT KGKRAPFTNF DPSTLLPSSL DFWTYPGSLT  
201 HPLYESVTW IICK**ESISVS SEQLAQFR**SL LSNVEGDNAV PMQHNNRPTQ  
251 PLKGRTVRAS F



Spot 7541

P23396 40s ribosomal protein S3

712.3198 m/z (z = +2), Mass error (ppm) = -26.45, Mascot score = 53

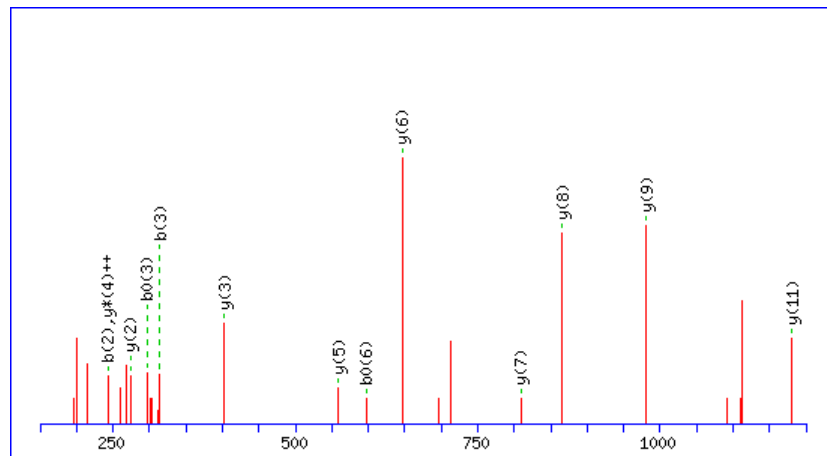

| #  | b               | b <sup>++</sup> | b <sup>0</sup>  | b <sup>0++</sup> | Seq. | y                | y <sup>++</sup> | y <sup>*</sup> | y <sup>+++</sup> | y <sup>0</sup> | y <sup>0++</sup> | #  |
|----|-----------------|-----------------|-----------------|------------------|------|------------------|-----------------|----------------|------------------|----------------|------------------|----|
| 1  | 130.0499        | 65.5286         | 112.0393        | 56.5233          | E    |                  |                 |                |                  |                |                  | 13 |
| 2  | <b>243.1339</b> | 122.0706        | 225.1234        | 113.0653         | L    | 1294.6274        | 647.8173        | 1277.6008      | 639.3040         | 1276.6168      | 638.8120         | 12 |
| 3  | <b>314.1710</b> | 157.5892        | <b>296.1605</b> | 148.5839         | A    | <b>1181.5433</b> | 591.2753        | 1164.5168      | 582.7620         | 1163.5327      | 582.2700         | 11 |
| 4  | 443.2136        | 222.1105        | 425.2031        | 213.1052         | E    | 1110.5062        | 555.7567        | 1093.4796      | 547.2435         | 1092.4956      | 546.7515         | 10 |
| 5  | 558.2406        | 279.6239        | 540.2300        | 270.6186         | D    | <b>981.4636</b>  | 491.2354        | 964.4371       | 482.7222         | 963.4530       | 482.2302         | 9  |
| 6  | 615.2620        | 308.1347        | <b>597.2515</b> | 299.1294         | G    | <b>866.4367</b>  | 433.7220        | 849.4101       | 425.2087         | 848.4261       | 424.7167         | 8  |
| 7  | 778.3254        | 389.6663        | 760.3148        | 380.6610         | Y    | <b>809.4152</b>  | 405.2112        | 792.3886       | 396.6980         | 791.4046       | 396.2060         | 7  |
| 8  | 865.3574        | 433.1823        | 847.3468        | 424.1771         | S    | <b>646.3519</b>  | 323.6796        | 629.3253       | 315.1663         | 628.3413       | 314.6743         | 6  |
| 9  | 922.3789        | 461.6931        | 904.3683        | 452.6878         | G    | <b>559.3198</b>  | 280.1636        | 542.2933       | 271.6503         | 541.3093       | 271.1583         | 5  |
| 10 | 1021.4473       | 511.2273        | 1003.4367       | 502.2220         | V    | 502.2984         | 251.6528        | 485.2718       | <b>243.1395</b>  | 484.2878       | 242.6475         | 4  |
| 11 | 1150.4899       | 575.7486        | 1132.4793       | 566.7433         | E    | <b>403.2300</b>  | 202.1186        | 386.2034       | 193.6053         | 385.2194       | 193.1133         | 3  |
| 12 | 1249.5583       | 625.2828        | 1231.5477       | 616.2775         | V    | <b>274.1874</b>  | 137.5973        | 257.1608       | 129.0840         |                |                  | 2  |
| 13 |                 |                 |                 |                  | R    | 175.1190         | 88.0631         | 158.0924       | 79.5498          |                |                  | 1  |

Monoisotopic mass of neutral peptide Mr(calc): 1422.6627

Ions Score: 53 Expect: 0.0026

Matches : 13/116 fragment ions using 23 most intense peaks

Matched peptides shown in **Bold Red**

- 1 MAVQISKRRK FVADGIFKAE LNEFLTR**ELA EDGYSGVEVR** VTPTRTEIII
- 51 LATRTQNVLG EKGRRIRELT AVVQKRFGFP EGSVELYAEK VATRGLCAIA
- 101 QAESLRYKLL GGLAVRRACY GVLRFIMESG AKGCEVVVSG KLRGQRAKSM
- 151 KFVDGLMIHS GDPVNYVVDT AVRHVLLRQG VLGKIKIMIL PWDPTGKIGP
- 201 KKLPDHSVSI VEPKDEILPT TPISQKGGK PEPPAMPQPV PTA

Spot 8231

P62942 Peptidyl-prolyl cis-trans isomerase

657.8242 m/z (z = +2), Mass error (ppm) = -18.05, Mascot score = 53

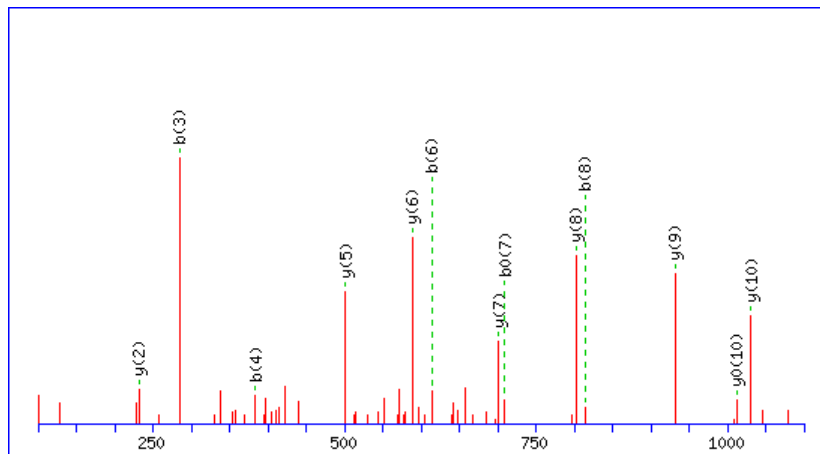

| #  | b               | b <sup>++</sup> | b <sup>*</sup> | b <sup>+++</sup> | b <sup>0</sup>  | b <sup>0++</sup> | Seq. | y                | y <sup>++</sup> | y <sup>*</sup> | y <sup>+++</sup> | y <sup>0</sup>   | y <sup>0++</sup> | #  |
|----|-----------------|-----------------|----------------|------------------|-----------------|------------------|------|------------------|-----------------|----------------|------------------|------------------|------------------|----|
| 1  | 58.0287         | 29.5180         |                |                  |                 |                  | G    |                  |                 |                |                  |                  |                  | 13 |
| 2  | 157.0972        | 79.0522         |                |                  |                 |                  | V    | 1257.6434        | 629.3253        | 1240.6168      | 620.8120         | 1239.6328        | 620.3200         | 12 |
| 3  | <b>285.1557</b> | 143.0815        | 268.1292       | 134.5682         |                 |                  | Q    | 1158.5749        | 579.7911        | 1141.5484      | 571.2778         | 1140.5644        | 570.7858         | 11 |
| 4  | <b>384.2241</b> | 192.6157        | 367.1976       | 184.1024         |                 |                  | V    | <b>1030.5164</b> | 515.7618        | 1013.4898      | 507.2485         | <b>1012.5058</b> | 506.7565         | 10 |
| 5  | 513.2667        | 257.1370        | 496.2402       | 248.6237         | 495.2562        | 248.1317         | E    | <b>931.4480</b>  | 466.2276        | 914.4214       | 457.7143         | 913.4374         | 457.2223         | 9  |
| 6  | <b>614.3144</b> | 307.6608        | 597.2879       | 299.1476         | 596.3039        | 298.6556         | T    | <b>802.4054</b>  | 401.7063        | 785.3788       | 393.1930         | 784.3948         | 392.7010         | 8  |
| 7  | 727.3985        | 364.2029        | 710.3719       | 355.6896         | <b>709.3879</b> | 355.1976         | I    | <b>701.3577</b>  | 351.1825        | 684.3311       | 342.6692         | 683.3471         | 342.1772         | 7  |
| 8  | <b>814.4305</b> | 407.7189        | 797.4040       | 399.2056         | 796.4199        | 398.7136         | S    | <b>588.2736</b>  | 294.6404        | 571.2471       | 286.1272         | 570.2630         | 285.6352         | 6  |
| 9  | 911.4833        | 456.2453        | 894.4567       | 447.7320         | 893.4727        | 447.2400         | P    | <b>501.2416</b>  | 251.1244        | 484.2150       | 242.6112         | 483.2310         | 242.1191         | 5  |
| 10 | 968.5047        | 484.7560        | 951.4782       | 476.2427         | 950.4942        | 475.7507         | G    | 404.1888         | 202.5980        | 387.1623       | 194.0848         | 386.1783         | 193.5928         | 4  |
| 11 | 1083.5317       | 542.2695        | 1066.5051      | 533.7562         | 1065.5211       | 533.2642         | D    | 347.1674         | 174.0873        | 330.1408       | 165.5740         | 329.1568         | 165.0820         | 3  |
| 12 | 1140.5531       | 570.7802        | 1123.5266      | 562.2669         | 1122.5426       | 561.7749         | G    | <b>232.1404</b>  | 116.5738        | 215.1139       | 108.0606         |                  |                  | 2  |
| 13 |                 |                 |                |                  |                 |                  | R    | 175.1190         | 88.0631         | 158.0924       | 79.5498          |                  |                  | 1  |

Monoisotopic mass of neutral peptide Mr(calc): 1313.6576

Ions Score: 53 Expect: 0.0041

Matches : 13/128 fragment ions using 19 most intense peaks

Matched peptides shown in **Bold Red**

**1** **MGVQVETISP GDGR**TFPKRG QTCVVHYTGM LEDGKKFDSS RDRNPKPFKM  
**51** LGKQEVIRGW EEGVAQMSVG QRAKLTISPD YAYGATGHPG IIPPHATLVF  
**101** DVLLKLE

Spot 1709

Q15084 Protein disulfide-isomerase A6

693.8756 m/z (z = +2), Mass error (ppm) = -10.66, Mascot score = 70

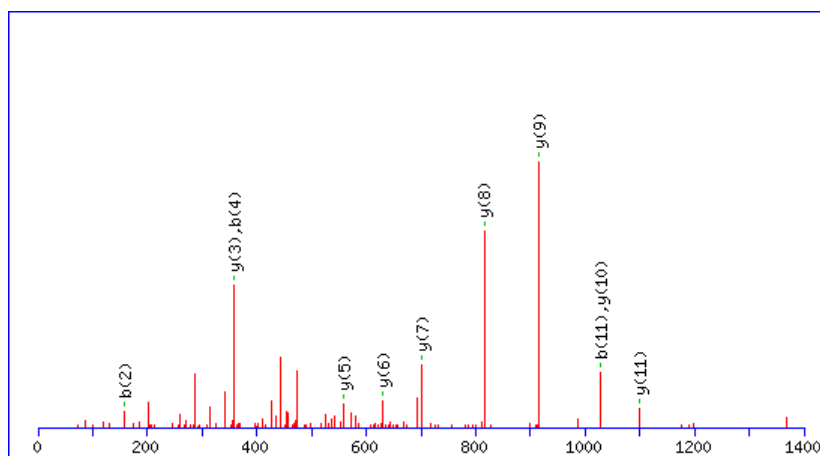

| #  | b                | b <sup>++</sup> | b <sup>0</sup> | b <sup>0++</sup> | Seq. | y                | y <sup>++</sup> | y <sup>*</sup> | y <sup>+++</sup> | y <sup>0</sup> | y <sup>0++</sup> | #  |
|----|------------------|-----------------|----------------|------------------|------|------------------|-----------------|----------------|------------------|----------------|------------------|----|
| 1  | 102.0550         | 51.5311         | 84.0444        | 42.5258          | T    |                  |                 |                |                  |                |                  | 14 |
| 2  | <b>159.0764</b>  | 80.0418         | 141.0659       | 71.0366          | G    | 1285.7110        | 643.3592        | 1268.6845      | 634.8459         | 1267.7005      | 634.3539         | 13 |
| 3  | 288.1190         | 144.5631        | 270.1084       | 135.5579         | E    | 1228.6896        | 614.8484        | 1211.6630      | 606.3352         | 1210.6790      | 605.8431         | 12 |
| 4  | <b>359.1561</b>  | 180.0817        | 341.1456       | 171.0764         | A    | <b>1099.6470</b> | 550.3271        | 1082.6204      | 541.8139         | 1081.6364      | 541.3218         | 11 |
| 5  | 472.2402         | 236.6237        | 454.2296       | 227.6185         | I    | <b>1028.6099</b> | 514.8086        | 1011.5833      | 506.2953         | 1010.5993      | 505.8033         | 10 |
| 6  | 571.3086         | 286.1579        | 553.2980       | 277.1527         | V    | <b>915.5258</b>  | 458.2665        | 898.4993       | 449.7533         | 897.5152       | 449.2613         | 9  |
| 7  | 686.3355         | 343.6714        | 668.3250       | 334.6661         | D    | <b>816.4574</b>  | 408.7323        | 799.4308       | 400.2191         | 798.4468       | 399.7271         | 8  |
| 8  | 757.3727         | 379.1900        | 739.3621       | 370.1847         | A    | <b>701.4304</b>  | 351.2189        | 684.4039       | 342.7056         | 683.4199       | 342.2136         | 7  |
| 9  | 828.4098         | 414.7085        | 810.3992       | 405.7032         | A    | <b>630.3933</b>  | 315.7003        | 613.3668       | 307.1870         | 612.3828       | 306.6950         | 6  |
| 10 | 941.4938         | 471.2506        | 923.4833       | 462.2453         | L    | <b>559.3562</b>  | 280.1817        | 542.3297       | 271.6685         | 541.3457       | 271.1765         | 5  |
| 11 | <b>1028.5259</b> | 514.7666        | 1010.5153      | 505.7613         | S    | 446.2722         | 223.6397        | 429.2456       | 215.1264         | 428.2616       | 214.6344         | 4  |
| 12 | 1099.5630        | 550.2851        | 1081.5524      | 541.2798         | A    | <b>359.2401</b>  | 180.1237        | 342.2136       | 171.6104         |                |                  | 3  |
| 13 | 1212.6470        | 606.8272        | 1194.6365      | 597.8219         | L    | 288.2030         | 144.6051        | 271.1765       | 136.0919         |                |                  | 2  |
| 14 |                  |                 |                |                  | R    | 175.1190         | 88.0631         | 158.0924       | 79.5498          |                |                  | 1  |

**Monoisotopic mass of neutral peptide Mr(calc): 1385.7514**

**Ions Score: 70 Expect: 7.9e-05**

**Matches : 11/124 fragment ions using 13 most intense peaks**

Matched peptides shown in **Bold Red**

1 MALLVLGLVS CTFFLAVNGL YSSDDVIEL TPSNFNREVI QDSLWLVEF  
51 YAPWCGHCQR LTP EWKKAAT ALKDVKVGA VDADKHSLG GQYGVQGFPT  
101 IKIFGSNKNR PEDYQGGR**TG EAIVDAALSA LR**QLVKDRLG GRSGGYSSGK  
151 QGRSDSSSK DVIELTDDSF DKNVLDSEDV WMVEFYAPWC GHCKNLEPEW  
201 AAAASEVKEQ TKGKVKLAAV DATVNQVLAS RYGIRGFPTI KIFQKGESPV  
251 DYDGGTRTSD IVSRALDIFS DNAPPELLE IINEDIAKRT CEEHQLCVVA  
301 VLPHILDTGA AGRNSYLEVL LKLADKYKKK MWGWLWTEAG AQSELETALG  
351 IGGFGYPAMA AINARKMKFA LLKGSFSEQG INEFLRELSF GRGSTAPVGG  
401 GAFPTIVERE PWDGRDGELP VEDDIDLSDV ELDDLKDEL

Spot 5506

P42126 3,2-trans-enoyl-CoA isomerase, mitochondrial

736.3927 m/z (z = +2), Mass error (ppm) = -2.97, Mascot score = 68

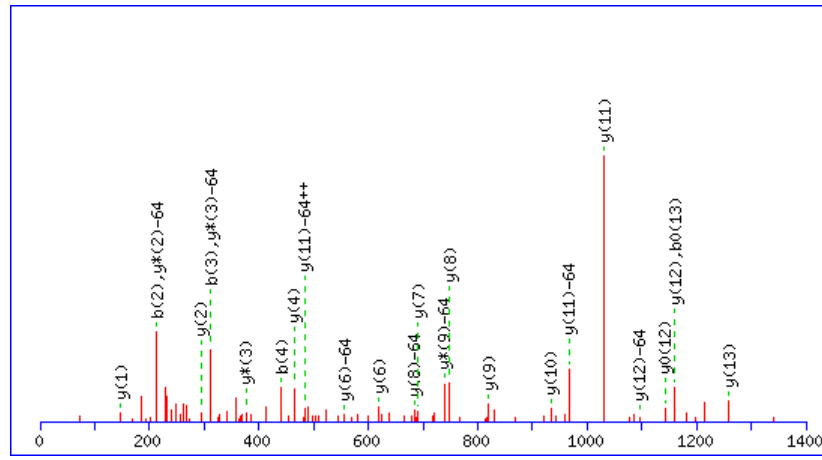

| #  | b               | b <sup>++</sup> | b <sup>0</sup>   | b <sup>0++</sup> | Seq. | y                | y <sup>++</sup> | y <sup>*</sup>  | y <sup>+++</sup> | y <sup>0</sup>   | y <sup>0++</sup> | #  |
|----|-----------------|-----------------|------------------|------------------|------|------------------|-----------------|-----------------|------------------|------------------|------------------|----|
| 1  | 100.0757        | 50.5415         |                  |                  | V    |                  |                 |                 |                  |                  |                  | 15 |
| 2  | <b>213.1598</b> | 107.0835        |                  |                  | L    | 1372.7141        | 686.8607        | 1355.6875       | 678.3474         | 1354.7035        | 677.8554         | 14 |
| 3  | <b>312.2282</b> | 156.6177        |                  |                  | V    | <b>1259.6300</b> | 630.3186        | 1242.6035       | 621.8054         | 1241.6195        | 621.3134         | 13 |
| 4  | <b>441.2708</b> | 221.1390        | 423.2602         | 212.1337         | E    | <b>1160.5616</b> | 580.7844        | 1143.5351       | 572.2712         | <b>1142.5510</b> | 571.7792         | 12 |
| 5  | 538.3235        | 269.6654        | 520.3130         | 260.6601         | P    | <b>1031.5190</b> | 516.2631        | 1014.4925       | 507.7499         | 1013.5084        | 507.2579         | 11 |
| 6  | 653.3505        | 327.1789        | 635.3399         | 318.1736         | D    | <b>934.4662</b>  | 467.7368        | 917.4397        | 459.2235         | 916.4557         | 458.7315         | 10 |
| 7  | 724.3876        | 362.6974        | 706.3770         | 353.6921         | A    | <b>819.4393</b>  | 410.2233        | 802.4128        | 401.7100         |                  |                  | 9  |
| 8  | 781.4090        | 391.2082        | 763.3985         | 382.2029         | G    | <b>748.4022</b>  | 374.7047        | 731.3756        | 366.1915         |                  |                  | 8  |
| 9  | 852.4462        | 426.7267        | 834.4356         | 417.7214         | A    | <b>691.3807</b>  | 346.1940        | 674.3542        | 337.6807         |                  |                  | 7  |
| 10 | 909.4676        | 455.2375        | 891.4571         | 446.2322         | G    | <b>620.3436</b>  | 310.6754        | 603.3171        | 302.1622         |                  |                  | 6  |
| 11 | 1008.5360       | 504.7717        | 990.5255         | 495.7664         | V    | 563.3221         | 282.1647        | 546.2956        | 273.6514         |                  |                  | 5  |
| 12 | 1079.5732       | 540.2902        | 1061.5626        | 531.2849         | A    | <b>464.2537</b>  | 232.6305        | 447.2272        | 224.1172         |                  |                  | 4  |
| 13 | 1178.6416       | 589.8244        | <b>1160.6310</b> | 580.8191         | V    | 393.2166         | 197.1119        | <b>376.1901</b> | 188.5987         |                  |                  | 3  |
| 14 | 1325.6770       | 663.3421        | 1307.6664        | 654.3368         | M    | <b>294.1482</b>  | 147.5777        | 277.1217        | 139.0645         |                  |                  | 2  |
| 15 |                 |                 |                  |                  | K    | <b>147.1128</b>  | 74.0600         | 130.0863        | 65.5468          |                  |                  | 1  |

Monoisotopic mass of neutral peptide Mr(calc): 1470.7752

Ions Score: 68 Expect: 0.00012

Matches : 25/182 fragment ions using 45 most intense peaks

Matched peptides shown in **Bold Red**

- 1 MALVASVRVP ARVLLRAGAR LPGAALGRTE RAAGGGDGAR RFGSQR**VLVE**
- 51 **PDAGAGVAVM** KFKNPPVNSL SLEFLTELVI SLEKLENDKS FRGVILTSDR
- 101 PGVFSAGLDL TEMCGRSPA YAGYWKAVQE LWLRLYQSNL VLVSAINGAC
- 151 PAGGCLVALT CDYRILADNP RYCIGLNETQ LGIAPFWLK DTLENTIGHR
- 201 AAERALQLGL LFPPAEALQV GIVDQVVPEE QVQSTALSAI AQWMAIPDHA
- 251 RQLTKAMMRK ATASRLVTQR DADVQNFVSF ISKDSIQKSL QMYLERLKEE
- 301 KG



Spot 8615

P23396 40S ribosomal protein s3

786.8586 m/z (z = +2), Mass error (ppm) = -30.61, Mascot score = 55

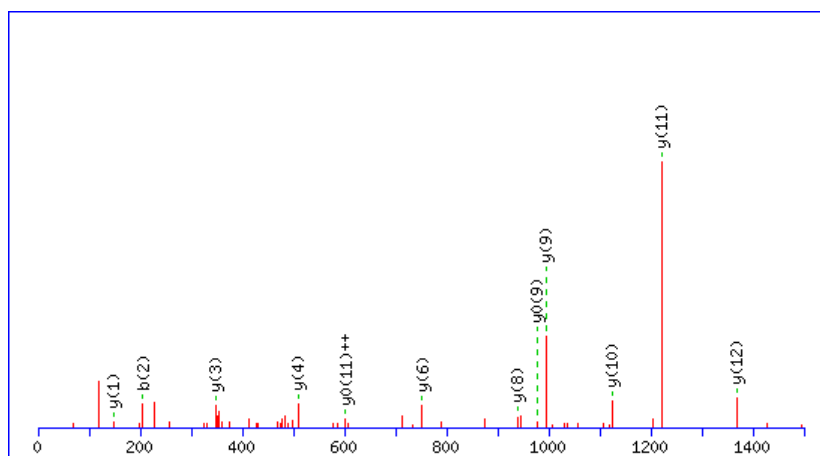

| #  | b               | b <sup>++</sup> | b <sup>0</sup> | b <sup>0++</sup> | Seq. | y                | y <sup>++</sup> | y <sup>*</sup> | y <sup>+++</sup> | y <sup>0</sup>  | y <sup>0++</sup> | #  |
|----|-----------------|-----------------|----------------|------------------|------|------------------|-----------------|----------------|------------------|-----------------|------------------|----|
| 1  | 148.0757        | 74.5415         |                |                  | F    |                  |                 |                |                  |                 |                  | 14 |
| 2  | <b>205.0972</b> | 103.0522        |                |                  | G    | 1425.6896        | 713.3485        | 1408.6631      | 704.8352         | 1407.6791       | 704.3432         | 13 |
| 3  | 352.1656        | 176.5864        |                |                  | F    | <b>1368.6682</b> | 684.8377        | 1351.6416      | 676.3245         | 1350.6576       | 675.8324         | 12 |
| 4  | 449.2183        | 225.1128        |                |                  | P    | <b>1221.5998</b> | 611.3035        | 1204.5732      | 602.7902         | 1203.5892       | <b>602.2982</b>  | 11 |
| 5  | 578.2609        | 289.6341        | 560.2504       | 280.6288         | E    | <b>1124.5470</b> | 562.7771        | 1107.5204      | 554.2639         | 1106.5364       | 553.7719         | 10 |
| 6  | 635.2824        | 318.1448        | 617.2718       | 309.1396         | G    | <b>995.5044</b>  | 498.2558        | 978.4779       | 489.7426         | <b>977.4938</b> | 489.2506         | 9  |
| 7  | 722.3144        | 361.6608        | 704.3039       | 352.6556         | S    | <b>938.4829</b>  | 469.7451        | 921.4564       | 461.2318         | 920.4724        | 460.7398         | 8  |
| 8  | 821.3828        | 411.1951        | 803.3723       | 402.1898         | V    | 851.4509         | 426.2291        | 834.4244       | 417.7158         | 833.4403        | 417.2238         | 7  |
| 9  | 950.4254        | 475.7164        | 932.4149       | 466.7111         | E    | <b>752.3825</b>  | 376.6949        | 735.3559       | 368.1816         | 734.3719        | 367.6896         | 6  |
| 10 | 1063.5095       | 532.2584        | 1045.4989      | 523.2531         | L    | 623.3399         | 312.1736        | 606.3134       | 303.6603         | 605.3293        | 303.1683         | 5  |
| 11 | 1226.5728       | 613.7900        | 1208.5623      | 604.7848         | Y    | <b>510.2558</b>  | 255.6316        | 493.2293       | 247.1183         | 492.2453        | 246.6263         | 4  |
| 12 | 1297.6099       | 649.3086        | 1279.5994      | 640.3033         | A    | <b>347.1925</b>  | 174.0999        | 330.1660       | 165.5866         | 329.1819        | 165.0946         | 3  |
| 13 | 1426.6525       | 713.8299        | 1408.6420      | 704.8246         | E    | 276.1554         | 138.5813        | 259.1288       | 130.0681         | 258.1448        | 129.5761         | 2  |
| 14 |                 |                 |                |                  | K    | <b>147.1128</b>  | 74.0600         | 130.0863       | 65.5468          |                 |                  | 1  |

**Monoisotopic mass of neutral peptide Mr(calc): 1571.7508**

**Ions Score: 55 Expect: 0.0021**

**Matches : 12/120 fragment ions using 26 most intense peaks**

Matched peptides shown in **Bold Red**

- 1 MAVQISKRRK FVADGIFKAE LNEFLTRELA EDGYSQVEVR VTPTRTEIII
- 51 LATRTQNVLG EKGRRIRELT AVVQKR**FGFP EGSVELYAEK** VATRGLCAIA
- 101 QAESLRYKLL GGLAVRRACY GVLRFIMESG AKGCEVVVSG KLRGQRAKSM
- 151 KFVDGLMIHS GDPVNYVDV AVRHVLLRQG VLGKVKIML PWDPTGKIGP
- 201 KKPLPDHVS IVEPKDEILPT TPISQKGGK PEPPAMPQPV PTA

Spot 0614

P67936 Tropomyosin alpha-4 chain

622.2897 m/z (z = +2), Mass error (ppm) = -64.95, Mascot score = 53

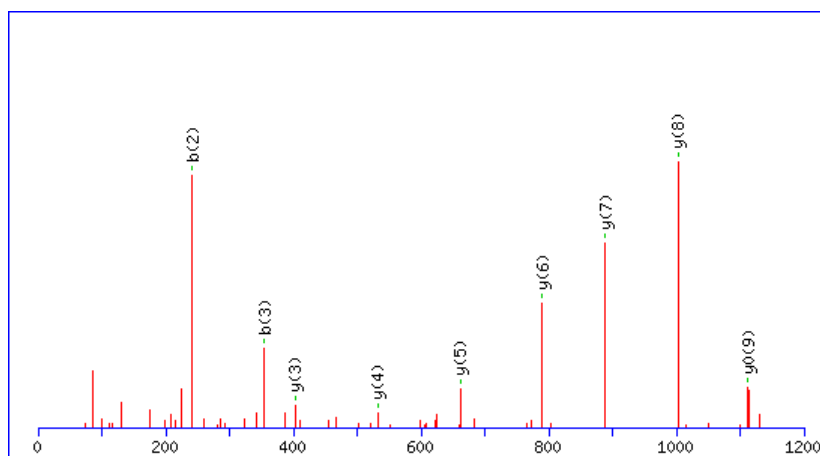

| #  | b               | b <sup>++</sup> | b <sup>*</sup> | b <sup>+++</sup> | b <sup>0</sup> | b <sup>0++</sup> | Seq. | y                | y <sup>++</sup> | y <sup>*</sup> | y <sup>+++</sup> | y <sup>0</sup>   | y <sup>0++</sup> | #  |
|----|-----------------|-----------------|----------------|------------------|----------------|------------------|------|------------------|-----------------|----------------|------------------|------------------|------------------|----|
| 1  | 114.0913        | 57.5493         |                |                  |                |                  | I    |                  |                 |                |                  |                  |                  | 10 |
| 2  | <b>242.1499</b> | 121.5786        | 225.1234       | 113.0653         |                |                  | Q    | 1130.5688        | 565.7880        | 1113.5422      | 557.2748         | <b>1112.5582</b> | 556.7828         | 9  |
| 3  | <b>355.2340</b> | 178.1206        | 338.2074       | 169.6074         |                |                  | L    | <b>1002.5102</b> | 501.7587        | 985.4837       | 493.2455         | 984.4997         | 492.7535         | 8  |
| 4  | 454.3024        | 227.6548        | 437.2758       | 219.1416         |                |                  | V    | <b>889.4262</b>  | 445.2167        | 872.3996       | 436.7034         | 871.4156         | 436.2114         | 7  |
| 5  | 583.3450        | 292.1761        | 566.3184       | 283.6629         | 565.3344       | 283.1709         | E    | <b>790.3577</b>  | 395.6825        | 773.3312       | 387.1692         | 772.3472         | 386.6772         | 6  |
| 6  | 712.3876        | 356.6974        | 695.3610       | 348.1842         | 694.3770       | 347.6921         | E    | <b>661.3151</b>  | 331.1612        | 644.2886       | 322.6479         | 643.3046         | 322.1559         | 5  |
| 7  | 841.4302        | 421.2187        | 824.4036       | 412.7055         | 823.4196       | 412.2134         | E    | <b>532.2726</b>  | 266.6399        | 515.2460       | 258.1266         | 514.2620         | 257.6346         | 4  |
| 8  | 954.5142        | 477.7608        | 937.4877       | 469.2475         | 936.5037       | 468.7555         | L    | <b>403.2300</b>  | 202.1186        | 386.2034       | 193.6053         | 385.2194         | 193.1133         | 3  |
| 9  | 1069.5412       | 535.2742        | 1052.5146      | 526.7610         | 1051.5306      | 526.2689         | D    | 290.1459         | 145.5766        | 273.1193       | 137.0633         | 272.1353         | 136.5713         | 2  |
| 10 |                 |                 |                |                  |                |                  | R    | 175.1190         | 88.0631         | 158.0924       | 79.5498          |                  |                  | 1  |

Monoisotopic mass of neutral peptide Mr(calc): 1242.6456

Ions Score: 53 Expect: 0.004

Matches : 9/96 fragment ions using 11 most intense peaks

Matched peptides shown in **Bold Red**

1 MDAIKKKMQM LKLDKENALD RAEQAEADKK AAEDRSKQLE DELVSLQKKL  
51 KGTEDELDKY SEALKDAQEK LELAEEKATD AADVASLNR **RIQLVEEELD**  
101 **RAQERLATAL** QKLEEAEKAA DESERGMKVI ESRAQKDEEK MEIQEIQLKE  
151 AKHIAEDADR KYEEVARKLV IIESDLERA EERAESEGKC AELEELKTV  
201 TNNLKSLEAQ AEKYSQKEDR YEEEIKVLSD KLKEAETRAE FAERSVTKLE  
251 KSIDDLEDEL YAQKLKYKAI SEELDHALND MTSI

Spot 7603

P40925 Malate dehydrogenase, cytoplasmic

879.4485 m/z (z = +2), Mass error (ppm) = -18.05, Mascot score = 84

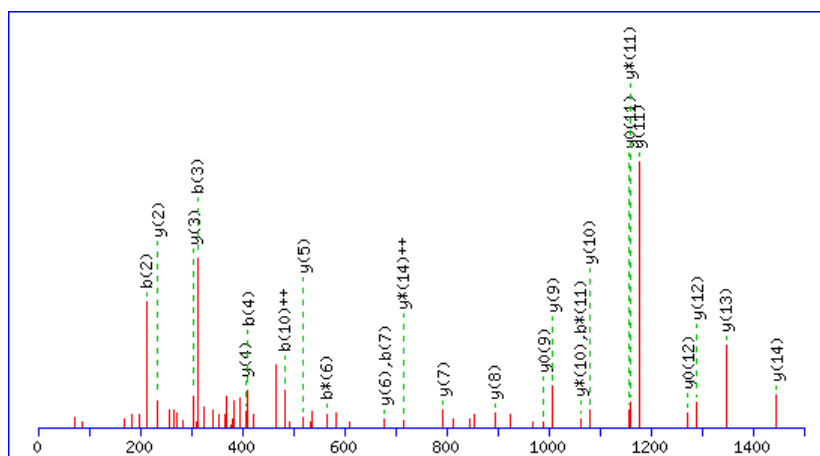

| #  | b               | b <sup>++</sup> | b <sup>*</sup>   | b <sup>+++</sup> | b <sup>0</sup> | b <sup>0++</sup> | Seq. | y                | y <sup>++</sup> | y <sup>*</sup>   | y <sup>+++</sup> | y <sup>0</sup>   | y <sup>0++</sup> | #  |
|----|-----------------|-----------------|------------------|------------------|----------------|------------------|------|------------------|-----------------|------------------|------------------|------------------|------------------|----|
| 1  | 100.0757        | 50.5415         |                  |                  |                |                  | V    |                  |                 |                  |                  |                  |                  | 17 |
| 2  | <b>213.1598</b> | 107.0835        |                  |                  |                |                  | I    | 1658.8530        | 829.9302        | 1641.8265        | 821.4169         | 1640.8425        | 820.9249         | 16 |
| 3  | <b>312.2282</b> | 156.6177        |                  |                  |                |                  | V    | 1545.7690        | 773.3881        | 1528.7424        | 764.8748         | 1527.7584        | 764.3828         | 15 |
| 4  | <b>411.2966</b> | 206.1519        |                  |                  |                |                  | V    | <b>1446.7006</b> | 723.8539        | 1429.6740        | <b>715.3406</b>  | 1428.6900        | 714.8486         | 14 |
| 5  | 468.3180        | 234.6627        |                  |                  |                |                  | G    | <b>1347.6321</b> | 674.3197        | 1330.6056        | 665.8064         | 1329.6216        | 665.3144         | 13 |
| 6  | 582.3610        | 291.6841        | <b>565.3344</b>  | 283.1709         |                |                  | N    | <b>1290.6107</b> | 645.8090        | 1273.5841        | 637.2957         | <b>1272.6001</b> | 636.8037         | 12 |
| 7  | <b>679.4137</b> | 340.2105        | 662.3872         | 331.6972         |                |                  | P    | <b>1176.5677</b> | 588.7875        | <b>1159.5412</b> | 580.2742         | <b>1158.5572</b> | 579.7822         | 11 |
| 8  | 750.4509        | 375.7291        | 733.4243         | 367.2158         |                |                  | A    | <b>1079.5150</b> | 540.2611        | <b>1062.4884</b> | 531.7479         | 1061.5044        | 531.2558         | 10 |
| 9  | 864.4938        | 432.7505        | 847.4672         | 424.2373         |                |                  | N    | <b>1008.4779</b> | 504.7426        | 991.4513         | 496.2293         | <b>990.4673</b>  | 495.7373         | 9  |
| 10 | 965.5415        | <b>483.2744</b> | 948.5149         | 474.7611         | 947.5309       | 474.2691         | T    | <b>894.4349</b>  | 447.7211        | 877.4084         | 439.2078         | 876.4244         | 438.7158         | 8  |
| 11 | 1079.5844       | 540.2958        | <b>1062.5578</b> | 531.7826         | 1061.5738      | 531.2905         | N    | <b>793.3873</b>  | 397.1973        | 776.3607         | 388.6840         | 775.3767         | 388.1920         | 7  |
| 12 | 1239.6150       | 620.3112        | 1222.5885        | 611.7979         | 1221.6045      | 611.3059         | C    | <b>679.3443</b>  | 340.1758        | 662.3178         | 331.6625         | 661.3338         | 331.1705         | 6  |
| 13 | 1352.6991       | 676.8532        | 1335.6725        | 668.3399         | 1334.6885      | 667.8479         | L    | <b>519.3137</b>  | 260.1605        | 502.2871         | 251.6472         | 501.3031         | 251.1552         | 5  |
| 14 | 1453.7468       | 727.3770        | 1436.7202        | 718.8638         | 1435.7362      | 718.3717         | T    | <b>406.2298</b>  | 203.6185        | 389.2031         | 195.1052         | 388.2191         | 194.6132         | 4  |
| 15 | 1524.7839       | 762.8956        | 1507.7573        | 754.3823         | 1506.7733      | 753.8903         | A    | <b>305.1819</b>  | 153.0946        | 288.1554         | 144.5813         | 287.1714         | 144.0893         | 3  |
| 16 | 1611.8159       | 806.4116        | 1594.7894        | 797.8983         | 1593.8054      | 797.4063         | S    | <b>234.1448</b>  | 117.5761        | 217.1183         | 109.0628         | 216.1343         | 108.5708         | 2  |
| 17 |                 |                 |                  |                  |                |                  | K    | 147.1128         | 74.0600         | 130.0863         | 65.5468          |                  |                  | 1  |

Monoisotopic mass of neutral peptide Mr(calc): 1756.9142

Ions Score: 84 Expect: 2.6e-06

Matches : 26/162 fragment ions using 49 most intense peaks

Matched peptides shown in **Bold Red**

- 1 MSEPIRLVT GAAGQIAYSL LYSIGNSVF GKDQPIILVL LDITPMMGVL
- 51 DGVLMEIQDC ALPLKDVIA TDKEDVAFKD LDVAILV GSM PRREGMERKD
- 101 LLKANVKIFK SQGAALDKYA KKSVK**VIVVG NPANTNCLTA SKS**SAPSIPKE
- 151 NFSCLTRLDH NRAKAQIALK LGVTANDVKNI VVIWGNHSS T QYPDVNHAKV
- 201 KLGQKEVGVY EALKDDSWLK GEFVTTVQQR GAAVIKARKL SSAMSAAKAI
- 251 CDHVRDIWFG TPEGEFVSMG VISDGNSYGV PDDL LYSFPV VIKNKTWK FV
- 301 EGLPINDFSR EKMDLTAKEL TEEKESAFEF LSSA

Spot 7603

P04406 Glyceraldehyde-3-phosphate dehydrogenase

807.4574 m/z (z = +2), Mass error (ppm) = 4.07, Mascot score = 48

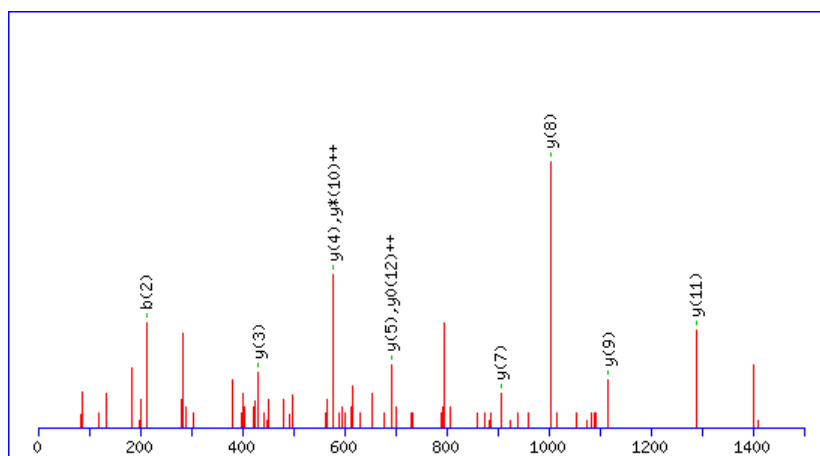

| #  | b               | b <sup>++</sup> | b <sup>*</sup> | b <sup>*++</sup> | b <sup>0</sup> | b <sup>0++</sup> | Seq. | y                | y <sup>++</sup> | y <sup>*</sup> | y <sup>*++</sup> | y <sup>0</sup> | y <sup>0++</sup> | #  |
|----|-----------------|-----------------|----------------|------------------|----------------|------------------|------|------------------|-----------------|----------------|------------------|----------------|------------------|----|
| 1  | 114.0913        | 57.5493         |                |                  |                |                  | L    |                  |                 |                |                  |                |                  | 14 |
| 2  | <b>213.1598</b> | 107.0835        |                |                  |                |                  | V    | 1500.8169        | 750.9121        | 1483.7904      | 742.3988         | 1482.8063      | 741.9068         | 13 |
| 3  | 326.2438        | 163.6255        |                |                  |                |                  | I    | 1401.7485        | 701.3779        | 1384.7219      | 692.8646         | 1383.7379      | <b>692.3726</b>  | 12 |
| 4  | 440.2867        | 220.6470        | 423.2602       | 212.1337         |                |                  | A    | <b>1288.6644</b> | 644.8359        | 1271.6379      | 636.3226         | 1270.6539      | 635.8306         | 11 |
| 5  | 497.3082        | 249.1577        | 480.2817       | 240.6445         |                |                  | G    | 1174.6215        | 587.8144        | 1157.5950      | <b>579.3011</b>  | 1156.6109      | 578.8091         | 10 |
| 6  | 611.3511        | 306.1792        | 594.3246       | 297.6659         |                |                  | N    | <b>1117.6000</b> | 559.3037        | 1100.5735      | 550.7904         | 1099.5895      | 550.2984         | 9  |
| 7  | 708.4039        | 354.7056        | 691.3774       | 346.1923         |                |                  | P    | <b>1003.5571</b> | 502.2822        | 986.5306       | 493.7689         | 985.5465       | 493.2769         | 8  |
| 8  | 821.4880        | 411.2476        | 804.4614       | 402.7343         |                |                  | I    | <b>906.5043</b>  | 453.7558        | 889.4778       | 445.2425         | 888.4938       | 444.7505         | 7  |
| 9  | 922.5356        | 461.7715        | 905.5091       | 453.2582         | 904.5251       | 452.7662         | T    | 793.4203         | 397.2138        | 776.3937       | 388.7005         | 775.4097       | 388.2085         | 6  |
| 10 | 1035.6197       | 518.3135        | 1018.5932      | 509.8002         | 1017.6091      | 509.3082         | I    | <b>692.3726</b>  | 346.6899        | 675.3461       | 338.1767         | 674.3620       | 337.6847         | 5  |
| 11 | 1182.6881       | 591.8477        | 1165.6616      | 583.3344         | 1164.6776      | 582.8424         | F    | <b>579.2885</b>  | 290.1479        | 562.2620       | 281.6346         | 561.2780       | 281.1426         | 4  |
| 12 | 1310.7467       | 655.8770        | 1293.7202      | 647.3637         | 1292.7361      | 646.8717         | Q    | <b>432.2201</b>  | 216.6137        | 415.1936       | 208.1004         | 414.2096       | 207.6084         | 3  |
| 13 | 1439.7893       | 720.3983        | 1422.7627      | 711.8850         | 1421.7787      | 711.3930         | E    | 304.1615         | 152.5844        | 287.1350       | 144.0711         | 286.1510       | 143.5791         | 2  |
| 14 |                 |                 |                |                  |                |                  | R    | 175.1190         | 88.0631         | 158.0924       | 79.5498          |                |                  | 1  |

Monoisotopic mass of neutral peptide Mr(calc): 1612.8937

Ions Score: 48 Expect: 0.01

Matches : 10/132 fragment ions using 13 most intense peaks

Matched peptides shown in **Bold Red**

1 MGKVKVGVNG FGRIGRLVTR AAFNSGKVDI VAINDPFIDL NYMVVYMFQYD  
51 STHGKFHGTV KAENGL**LVIN GNPITIFQER** DPSKIKWGDA GA EYVVVESTG  
101 VFTTMEKAGA HLQGGAKRVI ISAPSADAPM FVMGVNHEKY DNSLKIISNA  
151 SCTTNCLAPL AKVIHDNFGI VEGLMTTVHA ITATQKTVDG PSGKLWRDGR  
201 GALQNIIPAS TGAAKAVGKV IPELNGKLTG MAFRVPTANV SVVDLTCRLE  
251 KPAKYDDIKK VVKQASEGPL KGILGYTEHQ VVSSDFNSDT HSSTFDAGAG  
301 IALNDHFVKL ISWYDNEFGY SNRVVDLMAH MASKE



Spot 0205

ATP synthase subunit delta, mitochondrial

716.3362 m/z (z = +2), Mass error (ppm) = -29.55, Mascot score = 72

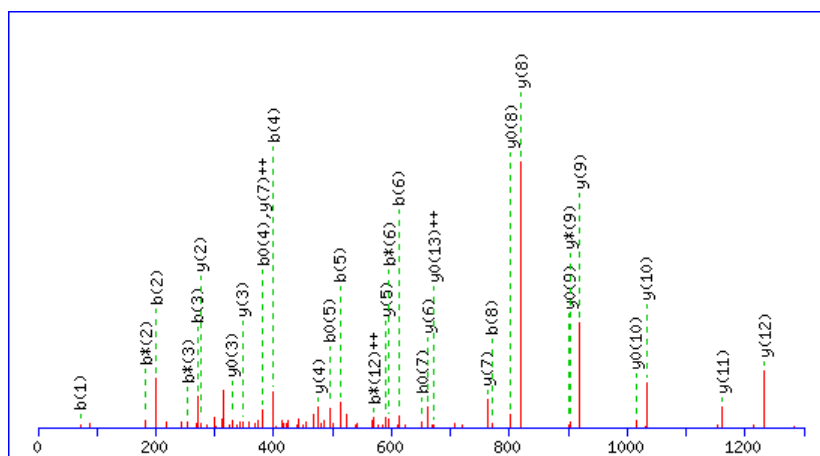

| #         | b               | b <sup>++</sup> | b <sup>*</sup>  | b <sup>+++</sup> | b <sup>0</sup>  | b <sup>0++</sup> | Seq.     | y                | y <sup>++</sup> | y <sup>*</sup>  | y <sup>+++</sup> | y <sup>0</sup>   | y <sup>0++</sup> | #         |
|-----------|-----------------|-----------------|-----------------|------------------|-----------------|------------------|----------|------------------|-----------------|-----------------|------------------|------------------|------------------|-----------|
| <b>1</b>  | <b>72.0444</b>  | 36.5258         |                 |                  |                 |                  | <b>A</b> |                  |                 |                 |                  |                  |                  | <b>14</b> |
| <b>2</b>  | <b>200.1030</b> | 100.5551        | <b>183.0764</b> | 92.0418          |                 |                  | <b>Q</b> | 1360.6703        | 680.8388        | 1343.6438       | 672.3255         | 1342.6597        | <b>671.8335</b>  | <b>13</b> |
| <b>3</b>  | <b>271.1401</b> | 136.0737        | <b>254.1135</b> | 127.5604         |                 |                  | <b>A</b> | <b>1232.6117</b> | 616.8095        | 1215.5852       | 608.2962         | 1214.6012        | 607.8042         | <b>12</b> |
| <b>4</b>  | <b>400.1827</b> | 200.5950        | 383.1561        | 192.0817         | <b>382.1721</b> | 191.5897         | <b>E</b> | <b>1161.5746</b> | 581.2909        | 1144.5481       | 572.7777         | 1143.5640        | 572.2857         | <b>11</b> |
| <b>5</b>  | <b>513.2667</b> | 257.1370        | 496.2402        | 248.6237         | <b>495.2562</b> | 248.1317         | <b>L</b> | <b>1032.5320</b> | 516.7696        | 1015.5055       | 508.2564         | <b>1014.5215</b> | 507.7644         | <b>10</b> |
| <b>6</b>  | <b>612.3352</b> | 306.6712        | <b>595.3086</b> | 298.1579         | 594.3246        | 297.6659         | <b>V</b> | <b>919.4480</b>  | 460.2276        | <b>902.4214</b> | 451.7143         | <b>901.4374</b>  | 451.2223         | <b>9</b>  |
| <b>7</b>  | 669.3566        | 335.1819        | 652.3301        | 326.6687         | <b>651.3461</b> | 326.1767         | <b>G</b> | <b>820.3795</b>  | 410.6934        | 803.3530        | 402.1801         | <b>802.3690</b>  | 401.6881         | <b>8</b>  |
| <b>8</b>  | <b>770.4043</b> | 385.7058        | 753.3777        | 377.1925         | 752.3937        | 376.7005         | <b>T</b> | <b>763.3581</b>  | <b>382.1827</b> | 746.3315        | 373.6694         | 745.3475         | 373.1774         | <b>7</b>  |
| <b>9</b>  | 841.4414        | 421.2243        | 824.4149        | 412.7111         | 823.4308        | 412.2191         | <b>A</b> | <b>662.3104</b>  | 331.6588        | 645.2838        | 323.1456         | 644.2998         | 322.6536         | <b>6</b>  |
| <b>10</b> | 956.4684        | 478.7378        | 939.4418        | 470.2245         | 938.4578        | 469.7325         | <b>D</b> | <b>591.2733</b>  | 296.1403        | 574.2467        | 287.6270         | 573.2627         | 287.1350         | <b>5</b>  |
| <b>11</b> | 1085.5109       | 543.2591        | 1068.4844       | 534.7458         | 1067.5004       | 534.2538         | <b>E</b> | <b>476.2463</b>  | 238.6268        | 459.2198        | 230.1135         | 458.2358         | 229.6215         | <b>4</b>  |
| <b>12</b> | 1156.5481       | 578.7777        | 1139.5215       | <b>570.2644</b>  | 1138.5375       | 569.7724         | <b>A</b> | <b>347.2037</b>  | 174.1055        | 330.1772        | 165.5922         | <b>329.1932</b>  | 165.1002         | <b>3</b>  |
| <b>13</b> | 1257.5957       | 629.3015        | 1240.5692       | 620.7882         | 1239.5852       | 620.2962         | <b>T</b> | <b>276.1666</b>  | 138.5870        | 259.1401        | 130.0737         | 258.1561         | 129.5817         | <b>2</b>  |
| <b>14</b> |                 |                 |                 |                  |                 |                  | <b>R</b> | 175.1190         | 88.0631         | 158.0924        | 79.5498          |                  |                  | <b>1</b>  |

Monoisotopic mass of neutral peptide Mr(calc): 1430.7001

Ions Score: 72 Expect: 0.00014

Matches : 32/146 fragment ions using 60 most intense peaks

Matched peptides shown in **Red**

**1** MLPAALLRRP GLGRLVRHAR AYAEAAAAPA AASGPNQMSF TFASPTQVFF  
**51** NGANVRQVDV PTLTGAFGIL AAHVPTLQVL RPGLVVVHAE DGTTSKYFVS  
**101** SGSIAVNADS SVQLLAEAV TLDMLDLGAA KANLEK**AQAE LVGTADEATR**  
**151** AEIQIRIEAN EALVKALE

Spot 2705

Q6NZI2 Polymerase I and transcript release factor

800.4467 m/z (z = +2), Mass error (ppm) = -9.44, Mascot score = 74

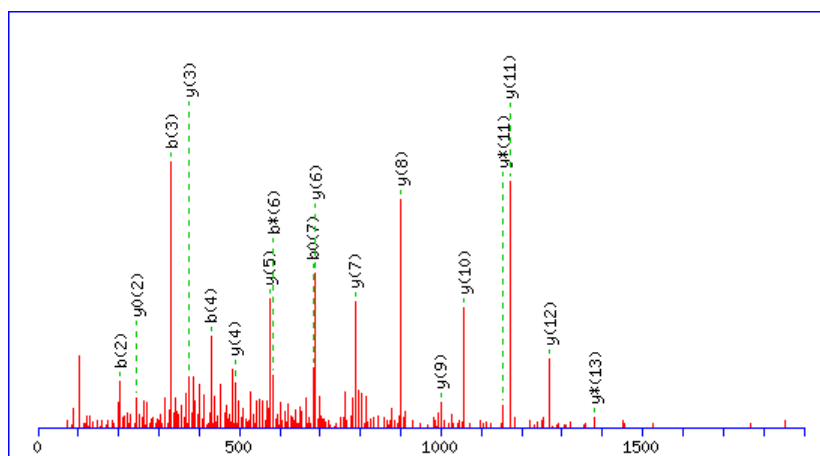

| #  | b               | b <sup>++</sup> | b <sup>*</sup>  | b <sup>+++</sup> | b <sup>0</sup>  | b <sup>0++</sup> | Seq. | y                | y <sup>++</sup> | y <sup>*</sup>   | y <sup>+++</sup> | y <sup>0</sup>  | y <sup>0++</sup> | #  |
|----|-----------------|-----------------|-----------------|------------------|-----------------|------------------|------|------------------|-----------------|------------------|------------------|-----------------|------------------|----|
| 1  | 88.0393         | 44.5233         |                 |                  | 70.0287         | 35.5180          | S    |                  |                 |                  |                  |                 |                  | 15 |
| 2  | <b>203.0662</b> | 102.0368        |                 |                  | 185.0557        | 93.0315          | D    | 1512.8632        | 756.9352        | 1495.8366        | 748.4220         | 1494.8526       | 747.9299         | 14 |
| 3  | <b>331.1248</b> | 166.0661        | 314.0983        | 157.5528         | 313.1143        | 157.0608         | Q    | 1397.8362        | 699.4218        | <b>1380.8097</b> | 690.9085         | 1379.8257       | 690.4165         | 13 |
| 4  | <b>430.1932</b> | 215.6003        | 413.1667        | 207.0870         | 412.1827        | 206.5950         | V    | <b>1269.7777</b> | 635.3925        | 1252.7511        | 626.8792         | 1251.7671       | 626.3872         | 12 |
| 5  | 544.2362        | 272.6217        | 527.2096        | 264.1084         | 526.2256        | 263.6164         | N    | <b>1170.7093</b> | 585.8583        | <b>1153.6827</b> | 577.3450         | 1152.6987       | 576.8530         | 11 |
| 6  | 601.2576        | 301.1325        | <b>584.2311</b> | 292.6192         | 583.2471        | 292.1272         | G    | <b>1056.6663</b> | 528.8368        | 1039.6398        | 520.3235         | 1038.6558       | 519.8315         | 10 |
| 7  | 700.3260        | 350.6667        | 683.2995        | 342.1534         | <b>682.3155</b> | 341.6614         | V    | <b>999.6449</b>  | 500.3261        | 982.6183         | 491.8128         | 981.6343        | 491.3208         | 9  |
| 8  | 813.4101        | 407.2087        | 796.3836        | 398.6954         | 795.3995        | 398.2034         | L    | <b>900.5764</b>  | 450.7919        | 883.5499         | 442.2786         | 882.5659        | 441.7866         | 8  |
| 9  | 912.4785        | 456.7429        | 895.4520        | 448.2296         | 894.4680        | 447.7376         | V    | <b>787.4924</b>  | 394.2498        | 770.4658         | 385.7366         | 769.4818        | 385.2445         | 7  |
| 10 | 1025.5626       | 513.2849        | 1008.5360       | 504.7717         | 1007.5520       | 504.2796         | L    | <b>688.4240</b>  | 344.7156        | 671.3974         | 336.2023         | 670.4134        | 335.7103         | 6  |
| 11 | 1112.5946       | 556.8009        | 1095.5681       | 548.2877         | 1094.5840       | 547.7957         | S    | <b>575.3399</b>  | 288.1736        | 558.3134         | 279.6603         | 557.3293        | 279.1683         | 5  |
| 12 | 1225.6787       | 613.3430        | 1208.6521       | 604.8297         | 1207.6681       | 604.3377         | L    | <b>488.3079</b>  | 244.6576        | 471.2813         | 236.1443         | 470.2973        | 235.6523         | 4  |
| 13 | 1338.7627       | 669.8850        | 1321.7362       | 661.3717         | 1320.7522       | 660.8797         | L    | <b>375.2238</b>  | 188.1155        | 358.1973         | 179.6023         | 357.2132        | 179.1103         | 3  |
| 14 | 1453.7897       | 727.3985        | 1436.7631       | 718.8852         | 1435.7791       | 718.3932         | D    | 262.1397         | 131.5735        | 245.1132         | 123.0602         | <b>244.1292</b> | 122.5682         | 2  |
| 15 |                 |                 |                 |                  |                 |                  | K    | 147.1128         | 74.0600         | 130.0863         | 65.5468          |                 |                  | 1  |

Monoisotopic mass of neutral peptide Mr(calc): 1598.8879

Ions Score: 74 Expect: 2.6e-05

Matches : 18/162 fragment ions using 29 most intense peaks

Matched peptides shown in **Bold Red**

1 MEDPTLYIVE RPLPGYPDAE APEPSSAGAQ AAEEPSGAGS EELIK**SDQVN**  
51 **GVLVLSLLDK** IIGAVDQIQL TQAQLEERQA EMEGAVQSIQ GELSKLGKAH  
101 ATTSNTVSKL LEKVRKVSVN VKTVRGLSLR QAGQIKKLEV NEALLRRRN  
151 FKVMIIYQDEV KLPAKLSISK SLKESEALPE KEGEELGEGE RPEEDAAALE  
201 LSSDEAVEVE EVIEESRAER IKRSGLRVD DFKKAFSKEK MEKTKVTRTE  
251 NLEKTRLKTK ENLEKTRHTL EKRMNKLGR LVPAERREKL KTSRDKLRKS  
301 FTPDHVYAR SKTAVYKVPV FTFHVKKIRE GQVEVLKATE MVEVGADDDE  
351 GGAERGEAGD LRRGSSPDVH ALLEITEESD AVLVDKSDSD

Spot 3409

P12111 Collagen alpha-3(VI)chain

729.3748 m/z (z = +2), Mass error (ppm) = -4.02, Mascot score = 51

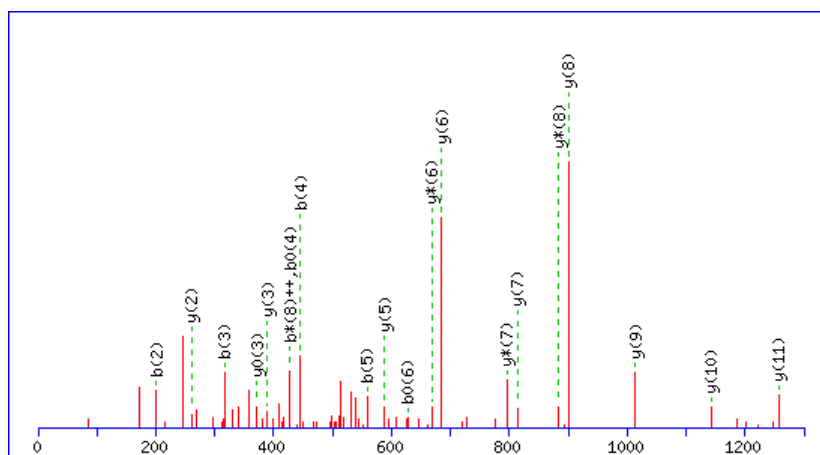

| #  | b               | b <sup>++</sup> | b <sup>*</sup> | b <sup>+++</sup> | b <sup>0</sup>  | b <sup>0++</sup> | Seq. | y                | y <sup>++</sup> | y <sup>*</sup>  | y <sup>+++</sup> | y <sup>0</sup>  | y <sup>0++</sup> | #  |
|----|-----------------|-----------------|----------------|------------------|-----------------|------------------|------|------------------|-----------------|-----------------|------------------|-----------------|------------------|----|
| 1  | 88.0393         | 44.5233         |                |                  | 70.0287         | 35.5180          | S    |                  |                 |                 |                  |                 |                  | 13 |
| 2  | <b>201.1234</b> | 101.0653        |                |                  | 183.1128        | 92.0600          | L    | 1370.7162        | 685.8617        | 1353.6896       | 677.3485         | 1352.7056       | 676.8564         | 12 |
| 3  | <b>316.1503</b> | 158.5788        |                |                  | 298.1397        | 149.5735         | D    | <b>1257.6321</b> | 629.3197        | 1240.6056       | 620.8064         | 1239.6216       | 620.3144         | 11 |
| 4  | <b>445.1929</b> | 223.1001        |                |                  | <b>427.1823</b> | 214.0948         | E    | <b>1142.6052</b> | 571.8062        | 1125.5786       | 563.2930         | 1124.5946       | 562.8009         | 10 |
| 5  | <b>558.2770</b> | 279.6421        |                |                  | 540.2664        | 270.6368         | I    | <b>1013.5626</b> | 507.2849        | 996.5360        | 498.7717         | 995.5520        | 498.2796         | 9  |
| 6  | 645.3090        | 323.1581        |                |                  | <b>627.2984</b> | 314.1529         | S    | <b>900.4785</b>  | 450.7429        | <b>883.4520</b> | 442.2296         | 882.4680        | 441.7376         | 8  |
| 7  | 773.3676        | 387.1874        | 756.3410       | 378.6742         | 755.3570        | 378.1821         | Q    | <b>813.4465</b>  | 407.2269        | <b>796.4199</b> | 398.7136         | 795.4359        | 398.2216         | 7  |
| 8  | 870.4203        | 435.7138        | 853.3938       | <b>427.2005</b>  | 852.4098        | 426.7085         | P    | <b>685.3879</b>  | 343.1976        | <b>668.3614</b> | 334.6843         | 667.3774        | 334.1923         | 6  |
| 9  | 941.4575        | 471.2324        | 924.4309       | 462.7191         | 923.4469        | 462.2271         | A    | <b>588.3352</b>  | 294.6712        | 571.3086        | 286.1579         | 570.3246        | 285.6659         | 5  |
| 10 | 1069.5160       | 535.2617        | 1052.4895      | 526.7484         | 1051.5055       | 526.2564         | Q    | 517.2980         | 259.1527        | 500.2715        | 250.6394         | 499.2875        | 250.1474         | 4  |
| 11 | 1198.5586       | 599.7829        | 1181.5321      | 591.2697         | 1180.5481       | 590.7777         | E    | <b>389.2395</b>  | 195.1234        | 372.2129        | 186.6101         | <b>371.2289</b> | 186.1181         | 3  |
| 12 | 1311.6427       | 656.3250        | 1294.6161      | 647.8117         | 1293.6321       | 647.3197         | L    | <b>260.1969</b>  | 130.6021        | 243.1703        | 122.0888         |                 |                  | 2  |
| 13 |                 |                 |                |                  |                 |                  | K    | 147.1128         | 74.0600         | 130.0863        | 65.5468          |                 |                  | 1  |

**Monoisotopic mass of neutral peptide Mr(calc):** 1456.7409

**Fixed modifications:** Carbamidomethyl (C) (apply to specified residues or termini only)

**Ions Score:** 51 **Expect:** 0.0054

**Matches :** 20/128 fragment ions using 42 most intense peaks

Matched peptides shown in **Bold Red**

1 MRKRRHLPLV AVFCLFLSGF PTTHAQQQA DVKNGAAADI IFLVDSSWTI  
51 GEEHFQLVRE FLYDVVKSLA VGENDFHFAL VQFNGNPHT E FLNTRYRTKQ  
101 EVLSHISNMS YIGGTNQTGK GLEYIMQSHL TKAAGSRAGD GVPQVIVVLT  
151 DGHSKDGLAL PSAELKSADV NVFAIGVEDA DEGALKEIAS EPLNMHMFNL  
201 ENFTSLHDIV GNLVSCVHSS VSPERAGDTE TLKDITAQDS ADIIFLIDGS  
251 NNTGSVNFVAV ILDFLVNLE KLPIGTQQIR VGVVQFSDEP RTMFLSLDTYS  
301 TKAQVLGAVK ALGFAGGELA NIGLALDFV V ENHFRTRAGGS RVEEGVPQVL  
351 VLISAGPSSD EIRYGVVALK QASVFSFGLG AQAASRAELQ HIATDDNLVF  
401 TVPEFRSFGD LQEKLLPYIV GVAQRHIVLK PPTIVTQVIE VNKRDIVFLV  
451 DGSSALGLAN FNAIRDFIAK VIQRLEIGQD LIQVAVAQYA DTVRPEFYFN  
501 THPTKREVIT AVRKMKPLDG SALYTGSA LD FVRNNLFTSS AGYRAAEGIP

551 KLLVLITGGK **SLDEISQPAQ ELK**RSSIMAF AIGNKGADQA ELEEIAFDSS  
601 LVFIPAEFRA APLQGMLPGL LAPLRTLSTGT PEVHSNKRDI IFLLDGSANV  
651 GKTNFPYVRD FVMNLVNSLD IGNDRNIRVGL VQFSDTPVTE FSLNTYQTKS  
701 DILGHLRQLQ LQGGSGLNTG SALSYYVANH FTEAGGSRIR EHVPLQLLLL  
751 TAGQSEDSYL QAANALTRAG ILTFCVGASQ ANKAELEQIA FNPSLVYLMQ  
801 DFSSLPALPQ QLIQPLTTYV SGGVEEVPLA QPESKRDLF LFDGSANLVG  
851 QFPVVRDFLY KIIDELNVKP EGTRIAVAQY SDDVKVESRF DEHQSKPEIL  
901 NLVKRMKIKT GKALNLGYAL DYAQRYIFVK SAGSRIEDGV LQFLVLLVAG  
951 RSSDRVDGPA SNLKQSGVVP FIFQAKNADP AELEQIVLSP AFILAAESLP  
1001 KIGDLHPQIV NLLKSVHNGA PAPVSGEKDV VFLLDGGSEGV RSGFPLLKEF  
1051 VQRVVESLDV GQDRVRVAVV QYSRTRPEF YLNSYMNKQD VVNAVRQLTL  
1101 LGGPTPNTGA ALEFVLRNIL VSSAGSRITE GVPQLLIVLT ADRSGDDVRN  
1151 PSVVVKRGGV VPIGIGIGNA DITEMQTISF IPDFAVAIPT FRQLGTVQQV  
1201 ISERVTLQTR EELSRLQPV LPLPSPGVGG KRQVFLIDG SQSAGPEFQY  
1251 VRTLIERLVD YLDVGFDTTR VAVIQFSDDP KVEFLLNAHS SKDEVQNAVQ  
1301 RLRPKGGRQI NVGNALYVS RNIFKRPLGS RIEEGVPQFL VLISSGKSDS  
1351 EVDDPAVELK QFGVAPFTIA RNADQEELVK ISLSPEYVFS VSTFRELPSL  
1401 EQKLLTPITT LTSEIQKLL ASTRYPPPAV ESDAADIVFL IDSSEGVVDP  
1451 GFAHIRDFVS RIVRRLNIGP SKVRVGVVQF SNDVFPEFY LKTYRSQAPVL  
1501 DAIRRLRLRG GSPLNTGKAL EFVARNLFVK SAGSRIEDGV PQHLVVLVGG  
1551 KSQDDVSRFA QVIRSSGIVS LGVGDRNIDR TELQTITNDP RLVFTVREFR  
1601 ELPNIEERIM NSFGPSAATP APPGVDTPPP SRPEKKKADI VFLLDGSINF  
1651 RRDSFQEVLR FVSEIVDTVY EDGDSIQVGL VQYNSDPTDE FFLKDFSTKR  
1701 QIIDAINKVV YKGGRHANTK VGLEHLRVNH FVPEAGSRLD QRVPQIAFVI  
1751 TGGKSVEDAQ DVSLALTQRG VKVFAVGVRN IDSEEVGKIA SNSATAFRVG  
1801 NVQELSE QVLETLHDAM HETLCPGVT DAAKACNLDVI LGFDGSRDQN  
1851 VFVAQKGFES KVDAILNRIS QMHRVSCSGG RSPTVRVSVV ANTPSGPVEA  
1901 FDFDEYQPEM LEKFRNMRSQ HPYVLTEDTL KVYLNKFRQS SPDSVKVVIH  
1951 FTDGADGDLA DLHRASENLR QEGVRALILV GLERVVNLER LMHLEFGRGF  
2001 MYDRPLRLNL LDLDYELAEQ LDNIAEKACC GVPCKCSGQR GDRGPIGSIG  
2051 PKGIPGEDGY RGYPGDEGGP GERGGPGVNG TQGFQGCPCGQ RGVKGSRGFP  
2101 GEKGEVGEIG LDGLDGEDGD KGLPGSSGEK GNPGRRGDKG PRGEKGERGD  
2151 VGIRGDPGNP GQDSQERGP GETGDLGPMG VPGRDGVPPG PGETGKNGGF  
2201 GRRGPPGAKG NKGPGQPGF EGEQTRGAQ GPAGPAGPPG LIGEQQISGP  
2251 RGSAGGAAGAP GERGRTGLG RKGEPGEPG KGGIGNRGPR GETGDDGRDG  
2301 VGSEGRRGK GERGFPGYPG PKGNPGEPL NGTTGPKGIR GRRGNSGPPG  
2351 IVGQKGDPGY GPGAGPKGNR GDSIDQCALI QSIKDKCPC YGPLECPVFP  
2401 TELAFALDTS EGVNQDTFGR MRDVVLSIVN DLTIAESNCP RGARVAVVY  
2451 NNEVTTEIRF ADSKRKSVLL DKIKNLQVAL TSKQQSLETA MSFVARNTFK  
2501 RVRNGFLMRK VAVFFSNTPT RASPQLREAV LKLS DAGITP LFLTRQEDRQ  
2551 LINALQINNT AVGHALVLP GRDLTDFLEN VLTCHVCLDI CNIDPSCGFG  
2601 SWRPSFRDRR AAGSDVDIDM AFILDSAETT TLFQFNEMKK YIAYLVRQLD  
2651 MSPDPKASQH FARVAVVQHA PSESVDNASM PPVKVEFSLT DYGSKEKLVQ  
2701 FLSRGMQLQ GTRALGSAIE YTIENVFESA PNPRDLKIVV LMLTGEVPEQ  
2751 QLEEAQRVIL QAKCKGYFFV VLGIGRKVNI KEVYTFASEP NDVFFKLVQ  
2801 STELNEEPLM RFGRLPSFV SENAFLYSP DIRKQCDWFQ GDQPTKNLVK  
2851 FGHKQVNVPN NVTSSPTSNP VTTTKPVT TTKPVTTTKPV TTTTKPVTTI  
2901 NQPSVKPAAA KPAPAKPAAA KPVATKTATV RPPVAVKPAT AAKPVAKPA  
2951 AVRPPAAAAA KPVATKPEVP RPQAAKPAAT KPATTKPMVK MSREVQVFEI

**3001** TNSAKLHWE RPEPPGPYFY DLTV TSAHDQ SLVLKQLTV TDRVIGLLA  
**3051** GQTYHVAVVC YLRSQVRATY HGSFSTKKSQ PPPQPARSASSTINLMVS  
**3101** TEPLALTETD ICKLPKDEGT CRDFILKWYY DPNTKSCARF WYGGCGGNEN  
**3151** KFGSQKECEK VCAPVLAKPG VISVMGT



Spot 5207

P46108 Proto-oncogene C-crk

606.8183 m/z (z = +2), Mass error (ppm) = -33.15, Mascot score = 52

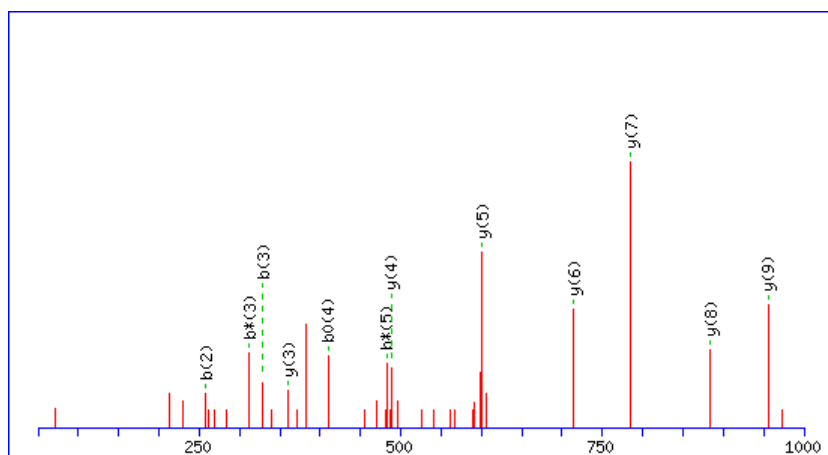

| #  | b               | b <sup>++</sup> | b <sup>+</sup>  | b <sup>+++</sup> | b <sup>0</sup>  | b <sup>0++</sup> | Seq. | y               | y <sup>++</sup> | y <sup>+</sup> | y <sup>+++</sup> | y <sup>0</sup> | y <sup>0++</sup> | #  |
|----|-----------------|-----------------|-----------------|------------------|-----------------|------------------|------|-----------------|-----------------|----------------|------------------|----------------|------------------|----|
| 1  | 129.0659        | 65.0366         | 112.0393        | 56.5233          |                 |                  | Q    |                 |                 |                |                  |                |                  | 11 |
| 2  | <b>258.1084</b> | 129.5579        | 241.0819        | 121.0446         | 240.0979        | 120.5526         | E    | 1084.6109       | 542.8091        | 1067.5844      | 534.2958         | 1066.6004      | 533.8038         | 10 |
| 3  | <b>329.1456</b> | 165.0764        | <b>312.1190</b> | 156.5631         | 311.1350        | 156.0711         | A    | <b>955.5683</b> | 478.2878        | 938.5418       | 469.7745         |                |                  | 9  |
| 4  | 428.2140        | 214.6106        | 411.1874        | 206.0974         | <b>410.2034</b> | 205.6053         | V    | <b>884.5312</b> | 442.7693        | 867.5047       | 434.2560         |                |                  | 8  |
| 5  | 499.2511        | 250.1292        | <b>482.2245</b> | 241.6159         | 481.2405        | 241.1239         | A    | <b>785.4628</b> | 393.2350        | 768.4363       | 384.7218         |                |                  | 7  |
| 6  | 612.3352        | 306.6712        | 595.3086        | 298.1579         | 594.3246        | 297.6659         | L    | <b>714.4257</b> | 357.7165        | 697.3992       | 349.2032         |                |                  | 6  |
| 7  | 725.4192        | 363.2132        | 708.3927        | 354.7000         | 707.4087        | 354.2080         | L    | <b>601.3416</b> | 301.1745        | 584.3151       | 292.6612         |                |                  | 5  |
| 8  | 853.4778        | 427.2425        | 836.4512        | 418.7293         | 835.4672        | 418.2373         | Q    | <b>488.2576</b> | 244.6324        | 471.2310       | 236.1191         |                |                  | 4  |
| 9  | 910.4993        | 455.7533        | 893.4727        | 447.2400         | 892.4887        | 446.7480         | G    | <b>360.1990</b> | 180.6031        | 343.1724       | 172.0899         |                |                  | 3  |
| 10 | 1038.5578       | 519.7826        | 1021.5313       | 511.2693         | 1020.5473       | 510.7773         | Q    | 303.1775        | 152.0924        | 286.1510       | 143.5791         |                |                  | 2  |
| 11 |                 |                 |                 |                  |                 |                  | R    | 175.1190        | 88.0631         | 158.0924       | 79.5498          |                |                  | 1  |

Monoisotopic mass of neutral peptide Mr(calc): 1211.6622

Ions Score: 52 Expect: 0.0045

Matches : 12/100 fragment ions using 21 most intense peaks

Matched peptides shown in **Bold Red**

1 MAGNFDSEER SSWYWGRLSR **QEAVALQGG** RHGVFLVRDS STSPGDYVLS  
51 VSENSRVSHY IINSSGPRPP VPPSPAQPPP GVSPSRLRIG DQEFDSLPAI  
101 LEFYKIHLYD TTTLIEPVS SRQSGVILR QEEAEYVRAL FDFNGNDEED  
151 LPFKKGDILR IRDKPEEQWW NAEDSEGKRG MIPVPYVEKY RPASASVSAL  
201 IGGNQEGSHP QPLGGPEPGP YAQPSVNTPL PNLQNGPIYA RVIQKRPNA  
251 YDKTALALEV GELVKVTKIN VSGQWEGECN GKRGHFPFTH VRLDQQNPD  
301 EDFS

Spot 7418

P04179 Superoxide dismutase [Mn], mitochondrial

712.8985 m/z (z = +2), Mass error (ppm) = -14.76, Mascot score = 83

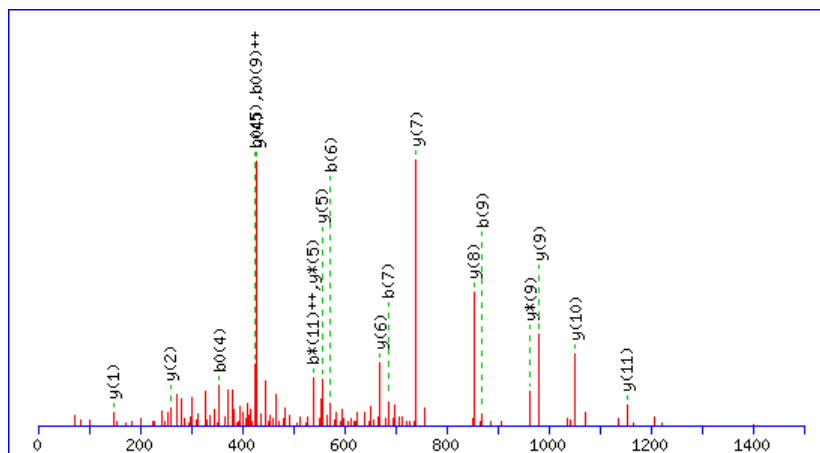

| #  | b               | b <sup>++</sup> | b <sup>*</sup> | b <sup>+++</sup> | b <sup>0</sup> | b <sup>0++</sup> | Seq. | y               | y <sup>++</sup> | y <sup>*</sup>  | y <sup>+++</sup> | y <sup>0</sup> | y <sup>0++</sup> | #  |
|----|-----------------|-----------------|----------------|------------------|----------------|------------------|------|-----------------|-----------------|-----------------|------------------|----------------|------------------|----|
| 1  | 58.0287         | 29.5180         |                |                  |                |                  | G    |                 |                 |                 |                  |                |                  | 14 |
| 2  | 173.0557        | 87.0315         |                |                  | 155.0451       | 78.0262          | D    | 1367.7893       | 684.3983        | 1350.7627       | 675.8850         | 1349.7787      | 675.3930         | 13 |
| 3  | 272.1241        | 136.5657        |                |                  | 254.1135       | 127.5604         | V    | 1252.7624       | 626.8848        | 1235.7358       | 618.3715         | 1234.7518      | 617.8795         | 12 |
| 4  | 373.1718        | 187.0895        |                |                  | 355.1612       | 178.0842         | T    | 1153.6939       | 577.3506        | 1136.6674       | 568.8373         | 1135.6834      | 568.3453         | 11 |
| 5  | 444.2089        | 222.6081        |                |                  | 426.1983       | 213.6028         | A    | 1052.6463       | 526.8268        | 1035.6197       | 518.3135         |                |                  | 10 |
| 6  | <b>572.2675</b> | 286.6374        | 555.2409       | 278.1241         | 554.2569       | 277.6321         | Q    | <b>981.6091</b> | 491.3082        | <b>964.5826</b> | 482.7949         |                |                  | 9  |
| 7  | <b>685.3515</b> | 343.1794        | 668.3250       | 334.6661         | 667.3410       | 334.1741         | I    | <b>853.5506</b> | 427.2789        | 836.5240        | 418.7656         |                |                  | 8  |
| 8  | 756.3886        | 378.6980        | 739.3621       | 370.1847         | 738.3781       | 369.6927         | A    | <b>740.4665</b> | 370.7369        | 723.4400        | 362.2236         |                |                  | 7  |
| 9  | <b>869.4727</b> | 435.2400        | 852.4462       | 426.7267         | 851.4621       | 426.2347         | L    | <b>669.4294</b> | 335.2183        | 652.4028        | 326.7051         |                |                  | 6  |
| 10 | 997.5313        | 499.2693        | 980.5047       | 490.7560         | 979.5207       | 490.2640         | Q    | <b>556.3453</b> | 278.6763        | <b>539.3188</b> | 270.1630         |                |                  | 5  |
| 11 | 1094.5841       | 547.7957        | 1077.5575      | <b>539.2824</b>  | 1076.5735      | 538.7904         | P    | <b>428.2867</b> | 214.6470        | 411.2602        | 206.1337         |                |                  | 4  |
| 12 | 1165.6212       | 583.3142        | 1148.5946      | 574.8009         | 1147.6106      | 574.3089         | A    | 331.2340        | 166.1206        | 314.2074        | 157.6074         |                |                  | 3  |
| 13 | 1278.7052       | 639.8563        | 1261.6787      | 631.3430         | 1260.6947      | 630.8510         | L    | <b>260.1969</b> | 130.6021        | 243.1703        | 122.0888         |                |                  | 2  |
| 14 |                 |                 |                |                  |                |                  | K    | <b>147.1128</b> | 74.0600         | 130.0863        | 65.5468          |                |                  | 1  |

Monoisotopic mass of neutral peptide Mr(calc): 1423.8035

Ions Score: 83 Expect: 3.7e-06

Matches : 19/124 fragment ions using 25 most intense peaks

Matched peptides shown in **Bold Red**

- 1 MLSRAVCGTS RQLAPALGYL GSRQKHSPLD LPYDYGALP HINAQIMQLH
- 51 HSKHHAAYVN NLNVTEEKYQ EALAK**GDVTA QIALQPALK**F NGGGHINHSI
- 101 FWTNLSPNGG GEPKGELLEA IKRDFGSFDK FKEKLTAAVS GVQSGSWGWL
- 151 GFNKERGLHQ IAACPNDPL QGTTGLIPLL GIDVWEHAYY LQYKNVRPDY
- 201 LKAIWNVINW ENVTERYMAC KK

Spot 8609

P00918 Carbonic anhydrase 2

834.9622 m/z (z = +2), Mass error (ppm) = -30.69, Mascot score = 41

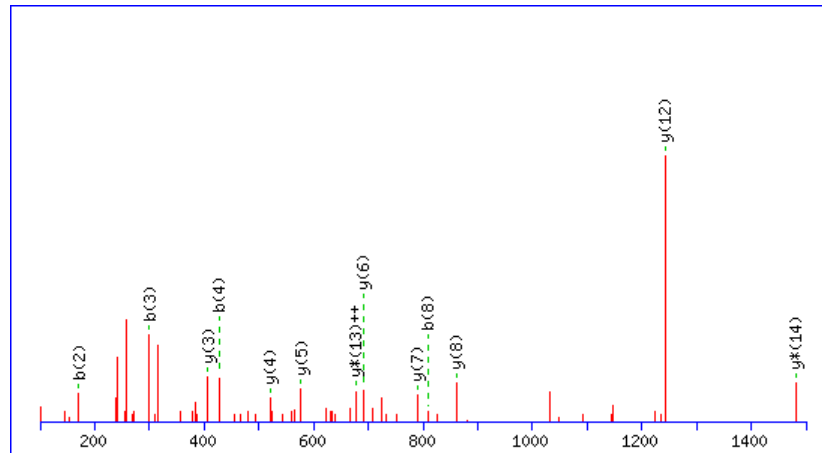

| #  | b               | b <sup>++</sup> | b <sup>*</sup> | b <sup>+++</sup> | b <sup>0</sup> | b <sup>0++</sup> | Seq. | y                | y <sup>++</sup> | y <sup>*</sup>   | y <sup>+++</sup> | y <sup>0</sup> | y <sup>0++</sup> | #  |
|----|-----------------|-----------------|----------------|------------------|----------------|------------------|------|------------------|-----------------|------------------|------------------|----------------|------------------|----|
| 1  | 72.0444         | 36.5258         |                |                  |                |                  | A    |                  |                 |                  |                  |                |                  | 16 |
| 2  | <b>171.1128</b> | 86.0600         |                |                  |                |                  | V    | 1597.9312        | 799.4692        | 1580.9047        | 790.9560         | 1579.9206      | 790.4640         | 15 |
| 3  | <b>299.1714</b> | 150.0893        | 282.1448       | 141.5761         |                |                  | Q    | 1498.8628        | 749.9350        | <b>1481.8362</b> | 741.4218         | 1480.8522      | 740.9298         | 14 |
| 4  | <b>427.2300</b> | 214.1186        | 410.2034       | 205.6053         |                |                  | Q    | 1370.8042        | 685.9057        | 1353.7777        | <b>677.3925</b>  | 1352.7936      | 676.9005         | 13 |
| 5  | 524.2827        | 262.6450        | 507.2562       | 254.1317         |                |                  | P    | <b>1242.7456</b> | 621.8765        | 1225.7191        | 613.3632         | 1224.7351      | 612.8712         | 12 |
| 6  | 639.3097        | 320.1585        | 622.2831       | 311.6452         | 621.2991       | 311.1532         | D    | 1145.6929        | 573.3501        | 1128.6663        | 564.8368         | 1127.6823      | 564.3448         | 11 |
| 7  | 696.3311        | 348.6692        | 679.3046       | 340.1559         | 678.3206       | 339.6639         | G    | 1030.6659        | 515.8366        | 1013.6394        | 507.3233         |                |                  | 10 |
| 8  | <b>809.4152</b> | 405.2112        | 792.3886       | 396.6980         | 791.4046       | 396.2060         | L    | 973.6445         | 487.3259        | 956.6179         | 478.8126         |                |                  | 9  |
| 9  | 880.4523        | 440.7298        | 863.4258       | 432.2165         | 862.4417       | 431.7245         | A    | <b>860.5604</b>  | 430.7838        | 843.5339         | 422.2706         |                |                  | 8  |
| 10 | 979.5207        | 490.2640        | 962.4942       | 481.7507         | 961.5102       | 481.2587         | V    | <b>789.5233</b>  | 395.2653        | 772.4967         | 386.7520         |                |                  | 7  |
| 11 | 1092.6048       | 546.8060        | 1075.5782      | 538.2928         | 1074.5942      | 537.8007         | L    | <b>690.4549</b>  | 345.7311        | 673.4283         | 337.2178         |                |                  | 6  |
| 12 | 1149.6263       | 575.3168        | 1132.5997      | 566.8035         | 1131.6157      | 566.3115         | G    | <b>577.3708</b>  | 289.1890        | 560.3443         | 280.6758         |                |                  | 5  |
| 13 | 1262.7103       | 631.8588        | 1245.6838      | 623.3455         | 1244.6997      | 622.8535         | I    | <b>520.3493</b>  | 260.6783        | 503.3228         | 252.1650         |                |                  | 4  |
| 14 | 1409.7787       | 705.3930        | 1392.7522      | 696.8797         | 1391.7682      | 696.3877         | F    | <b>407.2653</b>  | 204.1363        | 390.2387         | 195.6230         |                |                  | 3  |
| 15 | 1522.8628       | 761.9350        | 1505.8362      | 753.4218         | 1504.8522      | 752.9298         | L    | 260.1969         | 130.6021        | 243.1703         | 122.0888         |                |                  | 2  |
| 16 |                 |                 |                |                  |                |                  | K    | 147.1128         | 74.0600         | 130.0863         | 65.5468          |                |                  | 1  |

Monoisotopic mass of neutral peptide Mr(calc): 1667.9610

Ions Score: 41 Expect: 0.05

Matches : 13/146 fragment ions using 23 most intense peaks

Matched peptides shown in **Red**

- 1 MSHHWGYGKH NGPEHWHKDF PIAKGERQSP VDIDHTAKY DPSLKPLSVS
- 51 YDQATSLRIL NNGHAFNVEF DDSQDKAVLK GGPLDGYRL IQFHFHWGSL
- 101 DGQGEHTVD KKKYAAELHL VHWNTKYGDF GK**AVQQPDGL AVLGIFLKV**G
- 151 SAKPGLQKVV DVLDSIKTKG KSADFTNFD P RGLLPESLDY WTYPGSLTTP
- 201 PLECVTWIV LKEPISVSSE QVLKFRKLN F NGEPEPEELM VDNWRPAQPL
- 251 KNRQIKASFK



Spot 0405

P08758 Annexin A5

852.9268 m/z (z = +2), Mass error (ppm) = -32.33, Mascot score = 67

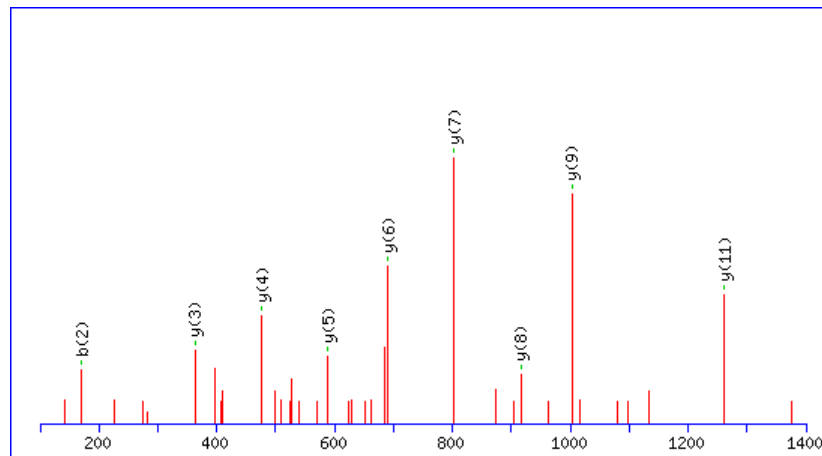

| #  | b               | b <sup>++</sup> | b <sup>0</sup> | b <sup>0++</sup> | Seq. | y                | y <sup>++</sup> | y <sup>*</sup> | y <sup>+++</sup> | y <sup>0</sup> | y <sup>0++</sup> | #  |
|----|-----------------|-----------------|----------------|------------------|------|------------------|-----------------|----------------|------------------|----------------|------------------|----|
| 1  | 58.0287         | 29.5180         |                |                  | G    |                  |                 |                |                  |                |                  | 16 |
| 2  | <b>171.1128</b> | 86.0600         |                |                  | L    | 1647.8800        | 824.4436        | 1630.8534      | 815.9303         | 1629.8694      | 815.4383         | 15 |
| 3  | 228.1343        | 114.5708        |                |                  | G    | 1534.7959        | 767.9016        | 1517.7693      | 759.3883         | 1516.7853      | 758.8963         | 14 |
| 4  | 329.1819        | 165.0946        | 311.1714       | 156.0893         | T    | 1477.7744        | 739.3909        | 1460.7479      | 730.8776         | 1459.7639      | 730.3856         | 13 |
| 5  | 444.2089        | 222.6081        | 426.1983       | 213.6028         | D    | 1376.7268        | 688.8670        | 1359.7002      | 680.3537         | 1358.7162      | 679.8617         | 12 |
| 6  | 573.2515        | 287.1294        | 555.2409       | 278.1241         | E    | <b>1261.6998</b> | 631.3535        | 1244.6733      | 622.8403         | 1243.6892      | 622.3483         | 11 |
| 7  | 702.2941        | 351.6507        | 684.2835       | 342.6454         | E    | 1132.6572        | 566.8322        | 1115.6307      | 558.3190         | 1114.6466      | 557.8270         | 10 |
| 8  | 789.3261        | 395.1667        | 771.3155       | 386.1614         | S    | <b>1003.6146</b> | 502.3109        | 986.5881       | 493.7977         | 985.6041       | 493.3057         | 9  |
| 9  | 902.4102        | 451.7087        | 884.3996       | 442.7034         | I    | <b>916.5826</b>  | 458.7949        | 899.5560       | 450.2817         | 898.5720       | 449.7897         | 8  |
| 10 | 1015.4942       | 508.2508        | 997.4837       | 499.2455         | L    | <b>803.4985</b>  | 402.2529        | 786.4720       | 393.7396         | 785.4880       | 393.2476         | 7  |
| 11 | 1116.5419       | 558.7746        | 1098.5313      | 549.7693         | T    | <b>690.4145</b>  | 345.7109        | 673.3879       | 337.1976         | 672.4039       | 336.7056         | 6  |
| 12 | 1229.6260       | 615.3166        | 1211.6154      | 606.3113         | L    | <b>589.3668</b>  | 295.1870        | 572.3402       | 286.6738         | 571.3562       | 286.1817         | 5  |
| 13 | 1342.7100       | 671.8587        | 1324.6995      | 662.8534         | L    | <b>476.2827</b>  | 238.6450        | 459.2562       | 230.1317         | 458.2722       | 229.6397         | 4  |
| 14 | 1443.7577       | 722.3825        | 1425.7472      | 713.3772         | T    | <b>363.1987</b>  | 182.1030        | 346.1721       | 173.5897         | 345.1881       | 173.0977         | 3  |
| 15 | 1530.7897       | 765.8985        | 1512.7792      | 756.8932         | S    | 262.1510         | 131.5791        | 245.1244       | 123.0659         | 244.1404       | 122.5738         | 2  |
| 16 |                 |                 |                |                  | R    | 175.1190         | 88.0631         | 158.0924       | 79.5498          |                |                  | 1  |

Monoisotopic mass of neutral peptide Mr(calc): 1703.8941

Ions Score: 67 Expect: 0.00013

Matches : 9/142 fragment ions using 12 most intense peaks

Matched peptides shown in **Red**

1 MAQVLRGTVT DFPGFDERAD AETLRKAMK**G LGTDEESILT LLTSRSNAQR**  
51 QEISAAFCTL FGRDLLDLK SELTGKFEKL IVALMKPSRL YDAYELKHAL  
101 KGAGTNEKVL TEIIASRTPE ELRAIKQVYE EYGSSLEDD VVGDTSGYYQ  
151 RMLVLLQAN RPDAGIDEA QVEQDAQALF QAGELKWGTD EEKFITIFGT  
201 RSVSHLRKVF DKYMTISGFQ IEETIDRETS GNLEQLLAV VKSIRSIPAY  
251 LAETLYAMK GAGTDDHTLI RVMVSRSEID LFNIRKEFRK NFATSLYSMI  
301 KGDTSGDYKK ALLLLCGEDD

Spot 2405

P23396 40S ribosomal protein S3

712.3304 m/z (z = +2), Mass error (ppm) = -11.55, Mascot score = 66

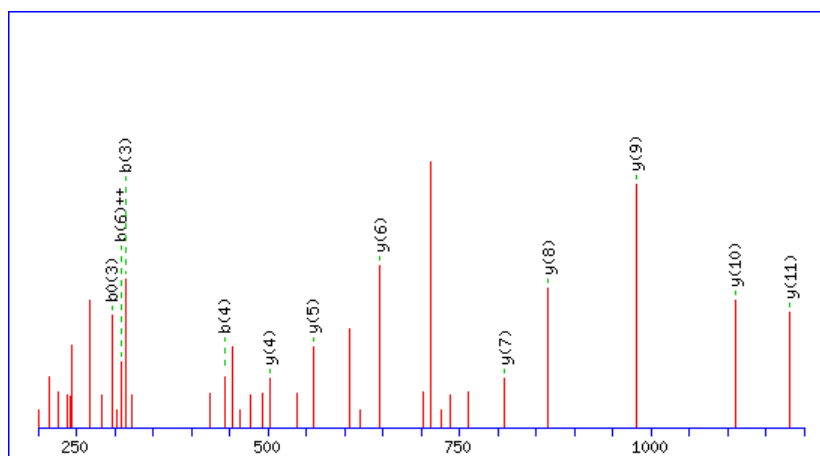

| #  | b               | b <sup>++</sup> | b <sup>0</sup>  | b <sup>0++</sup> | Seq. | y                | y <sup>++</sup> | y <sup>*</sup> | y <sup>+++</sup> | y <sup>0</sup> | y <sup>0++</sup> | #  |
|----|-----------------|-----------------|-----------------|------------------|------|------------------|-----------------|----------------|------------------|----------------|------------------|----|
| 1  | 130.0499        | 65.5286         | 112.0393        | 56.5233          | E    |                  |                 |                |                  |                |                  | 13 |
| 2  | 243.1339        | 122.0706        | 225.1234        | 113.0653         | L    | 1294.6274        | 647.8173        | 1277.6008      | 639.3040         | 1276.6168      | 638.8120         | 12 |
| 3  | <b>314.1710</b> | 157.5892        | <b>296.1605</b> | 148.5839         | A    | <b>1181.5433</b> | 591.2753        | 1164.5168      | 582.7620         | 1163.5327      | 582.2700         | 11 |
| 4  | <b>443.2136</b> | 222.1105        | 425.2031        | 213.1052         | E    | <b>1110.5062</b> | 555.7567        | 1093.4796      | 547.2435         | 1092.4956      | 546.7515         | 10 |
| 5  | 558.2406        | 279.6239        | 540.2300        | 270.6186         | D    | <b>981.4636</b>  | 491.2354        | 964.4371       | 482.7222         | 963.4530       | 482.2302         | 9  |
| 6  | 615.2620        | <b>308.1347</b> | 597.2515        | 299.1294         | G    | <b>866.4367</b>  | 433.7220        | 849.4101       | 425.2087         | 848.4261       | 424.7167         | 8  |
| 7  | 778.3254        | 389.6663        | 760.3148        | 380.6610         | Y    | <b>809.4152</b>  | 405.2112        | 792.3886       | 396.6980         | 791.4046       | 396.2060         | 7  |
| 8  | 865.3574        | 433.1823        | 847.3468        | 424.1771         | S    | <b>646.3519</b>  | 323.6796        | 629.3253       | 315.1663         | 628.3413       | 314.6743         | 6  |
| 9  | 922.3789        | 461.6931        | 904.3683        | 452.6878         | G    | <b>559.3198</b>  | 280.1636        | 542.2933       | 271.6503         | 541.3093       | 271.1583         | 5  |
| 10 | 1021.4473       | 511.2273        | 1003.4367       | 502.2220         | V    | <b>502.2984</b>  | 251.6528        | 485.2718       | 243.1395         | 484.2878       | 242.6475         | 4  |
| 11 | 1150.4899       | 575.7486        | 1132.4793       | 566.7433         | E    | 403.2300         | 202.1186        | 386.2034       | 193.6053         | 385.2194       | 193.1133         | 3  |
| 12 | 1249.5583       | 625.2828        | 1231.5477       | 616.2775         | V    | 274.1874         | 137.5973        | 257.1608       | 129.0840         |                |                  | 2  |
| 13 |                 |                 |                 |                  | R    | 175.1190         | 88.0631         | 158.0924       | 79.5498          |                |                  | 1  |

Monoisotopic mass of neutral peptide Mr(calc): 1422.6627

Ions Score: 66 Expect: 0.0002

Matches : 12/116 fragment ions using 17 most intense peaks

Matched peptides shown in **Bold Red**

1 MAVQISKRRK FVADGIFKAE LNEFLTRE**LA EDGYSGVEVR** VTPTRTEIII  
51 LATRTQNVLG EKGRRIRELT AVVQKRFQFP EGSVELYAEK VATRGLCAIA  
101 QAESLRYKLL GGLAVRRACY GVLRFIMESG AKGCEVVVSG KLRGQRAKSM  
151 KFVDGLMIHS GDPVNYVDT AVRHVLLRQG VLGIKVKIML PWDPTGKIGP  
201 KKPLPDHVS IVEPKDEILPT TPISQKGGK PEPPAMPQPV PTA

Spot 3506

P07355 Annexin A2

771.9196 m/z (z = +2), Mass error (ppm) = -10.82, Mascot score = 43

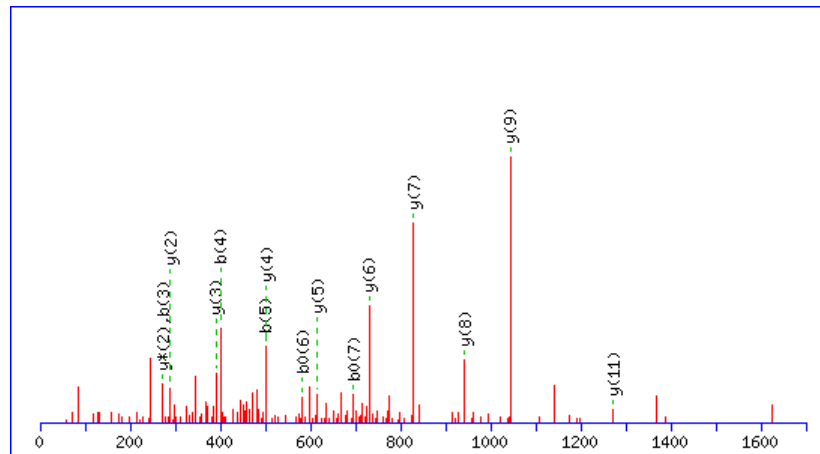

| #  | b               | b <sup>++</sup> | b <sup>*</sup> | b <sup>***</sup> | b <sup>0</sup>  | b <sup>0++</sup> | Seq. | y                | y <sup>++</sup> | y <sup>*</sup>  | y <sup>***</sup> | y <sup>0</sup> | y <sup>0++</sup> | #  |
|----|-----------------|-----------------|----------------|------------------|-----------------|------------------|------|------------------|-----------------|-----------------|------------------|----------------|------------------|----|
| 1  | 58.0287         | 29.5180         |                |                  |                 |                  | G    |                  |                 |                 |                  |                |                  | 14 |
| 2  | 157.0972        | 79.0522         |                |                  |                 |                  | V    | 1485.8271        | 743.4172        | 1468.8006       | 734.9039         | 1467.8166      | 734.4119         | 13 |
| 3  | <b>272.1241</b> | 136.5657        |                |                  | 254.1135        | 127.5604         | D    | 1386.7587        | 693.8830        | 1369.7322       | 685.3697         | 1368.7482      | 684.8777         | 12 |
| 4  | <b>401.1667</b> | 201.0870        |                |                  | 383.1561        | 192.0817         | E    | <b>1271.7318</b> | 636.3695        | 1254.7052       | 627.8563         | 1253.7212      | 627.3642         | 11 |
| 5  | <b>500.2351</b> | 250.6212        |                |                  | 482.2245        | 241.6159         | V    | 1142.6892        | 571.8482        | 1125.6626       | 563.3350         | 1124.6786      | 562.8429         | 10 |
| 6  | 601.2828        | 301.1450        |                |                  | <b>583.2723</b> | 292.1397         | T    | <b>1043.6208</b> | 522.3140        | 1026.5942       | 513.8007         | 1025.6102      | 513.3087         | 9  |
| 7  | 714.3668        | 357.6871        |                |                  | <b>696.3563</b> | 348.6818         | I    | <b>942.5731</b>  | 471.7902        | 925.5465        | 463.2769         | 924.5625       | 462.7849         | 8  |
| 8  | 813.4353        | 407.2213        |                |                  | 795.4247        | 398.2160         | V    | <b>829.4890</b>  | 415.2482        | 812.4625        | 406.7349         | 811.4785       | 406.2429         | 7  |
| 9  | 927.4782        | 464.2427        | 910.4516       | 455.7295         | 909.4676        | 455.2374         | N    | <b>730.4206</b>  | 365.7139        | 713.3941        | 357.2007         | 712.4100       | 356.7087         | 6  |
| 10 | 1040.5623       | 520.7848        | 1023.5357      | 512.2715         | 1022.5517       | 511.7795         | I    | <b>616.3777</b>  | 308.6925        | 599.3511        | 300.1792         | 598.3671       | 299.6872         | 5  |
| 11 | 1153.6463       | 577.3268        | 1136.6198      | 568.8135         | 1135.6358       | 568.3215         | L    | <b>503.2936</b>  | 252.1504        | 486.2671        | 243.6372         | 485.2831       | 243.1452         | 4  |
| 12 | 1254.6940       | 627.8506        | 1237.6674      | 619.3374         | 1236.6834       | 618.8454         | T    | <b>390.2096</b>  | 195.6084        | 373.1830        | 187.0951         | 372.1990       | 186.6031         | 3  |
| 13 | 1368.7369       | 684.8721        | 1351.7104      | 676.3588         | 1350.7264       | 675.8668         | N    | <b>289.1619</b>  | 145.0846        | <b>272.1353</b> | 136.5713         |                |                  | 2  |
| 14 |                 |                 |                |                  |                 |                  | R    | 175.1190         | 88.0631         | 158.0924        | 79.5498          |                |                  | 1  |

Monoisotopic mass of neutral peptide Mr(calc): 1541.8413

Ions Score: 43 Expect: 0.03

Matches : 15/132 fragment ions using 39 most intense peaks

Matched peptides shown in **Bold Red**

1 MSTVHEILCK LSLEGDHSTP PSAYGSVKAY TNFDAERDAL NIETAIKTK**G**  
51 **VDEVTIVNIL TNRS**NAQRQD IAFAYQRRTK KELASALKSA LSGHLETVIL  
101 GLLKTPAQYD ASELKASMKG LGTDEDSLIE IICSRNQL QEINRVYKEM  
151 YKTDLEKDII SDTSGDFRKL MVALAKGRRR EDGSVIDYEL IDQDARDLYD  
201 AGVKRKGTDV PKWISIMTER SVPHLQKQVFD RYKSYSPYDM LESIRKEVKG  
251 DLENAFLNLV QCICQNKPLYF ADRLYDSMKG KGTRDKVLIR IMVSRSEVDM  
301 LKIRSEFKRK YGKSLYYYIQ QDTKGDYQKA LLYLCGGDD

Supplementary Table 5. Results of the proteome pathway analysis. The table shows 8 most statistically significant interconnected groups of proteins (pathways) according to GeneGo Metacore analysis. The function of such groups can be estimated by associated GO Process terms.

| No | Network                                                    | GO Processes                                                                                                                                                                                                                                                                                               | p-Value  |
|----|------------------------------------------------------------|------------------------------------------------------------------------------------------------------------------------------------------------------------------------------------------------------------------------------------------------------------------------------------------------------------|----------|
| 1  | G3P2, PGK1, TPI1, FAAA, G3P1                               | pyruvate metabolic process (27.8%; 2.520e-09), gluconeogenesis (22.2%; 2.256e-08), hexose biosynthetic process (22.2%; 6.045e-08), monosaccharide biosynthetic process (22.2%; 1.871e-07), glycolysis (22.2%; 2.375e-07)                                                                                   | 5.93E-27 |
| 2  | HSPA1A, Cyclophilin A, PRDX1, HSP70, Lamin A/C             | cellular response to stress (41.0%; 2.130e-12), cellular response to stimulus (41.0%; 1.826e-09), response to DNA damage stimulus (28.2%; 5.033e-09), response to stress (53.8%; 5.165e-09), cellular response to hydrogen peroxide (12.8%; 5.225e-09)                                                     | 8.93E-34 |
| 3  | DJ-1, FKBP12, A-FABP, Annexin V, PRDX1                     | positive regulation of biological process (68.2%; 2.144e-14), positive regulation of cellular process (63.6%; 1.832e-13), response to stimulus (77.3%; 9.068e-12), response to stress (56.8%; 3.680e-11), regulation of biological quality (52.3%; 1.320e-10)                                              | 1.06E-27 |
| 4  | ENO1, Annexin II, Lamin A/C, Vimentin, HSPA1A              | regulation of apoptosis (53.2%; 1.826e-17), positive regulation of biological process (72.3%; 2.094e-17), regulation of programmed cell death (53.2%; 2.420e-17), regulation of cell death (53.2%; 2.727e-17), regulation of binding (31.9%; 1.334e-16)                                                    | 7.23E-25 |
| 5  | Vimentin, DJ-1, PRDX1, A-FABP, G3P2                        | regulation of biological quality (57.5%; 9.503e-12), homeostatic process (42.5%; 7.719e-11), positive regulation of cellular process (57.5%; 5.035e-10), response to stress (55.0%; 1.296e-09), positive regulation of biological process (57.5%; 3.546e-09)                                               | 1.29E-22 |
| 6  | Carbonic anhydrase II, CRK, DJ-1, Cyclophilin A, Annexin V | protein kinase cascade (36.1%; 1.446e-11), intracellular signaling cascade (47.2%; 8.781e-09), regulation of immune system process (30.6%; 4.584e-08), stress-activated protein kinase signaling pathway (16.7%; 5.265e-08), regulation of cellular component movement (22.2%; 1.789e-07)                  | 1.12E-17 |
| 7  | ENO1, CRK, PRDX1, PGK1, Catalase                           | protein kinase cascade (46.7%; 1.049e-20), intracellular signaling cascade (62.2%; 9.012e-18), regulation of phosphorylation (44.4%; 1.318e-16), regulation of phosphorus metabolic process (44.4%; 2.598e-16), regulation of phosphate metabolic process (44.4%; 2.598e-16)                               | 3.48E-17 |
| 8  | Annexin II, Annexin V, 14-3-3 gamma, PKC-alpha, Rac1       | regulation of receptor-mediated endocytosis (23.1%; 9.745e-07), regulation of phosphorylation (46.2%; 5.805e-06), regulation of phosphorus metabolic process (46.2%; 7.113e-06), regulation of phosphate metabolic process (46.2%; 7.113e-06), regulation of vesicle-mediated transport (30.8%; 8.384e-06) | 1.68E-07 |

**Supplementary Figure 1**

**Vimentin**

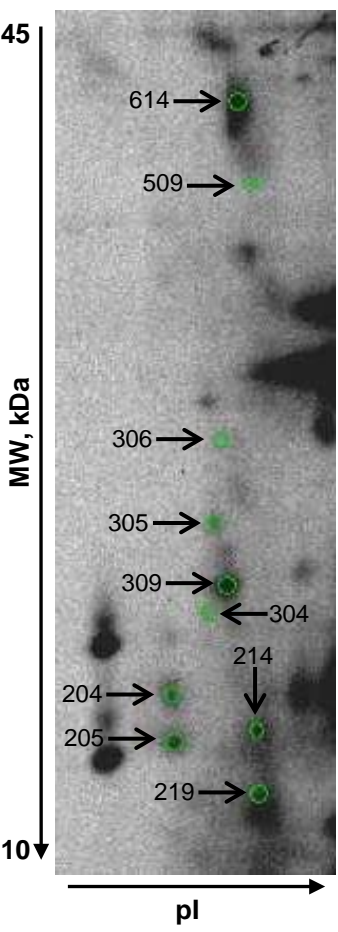

| <u>Spot #</u> | <u>Start - End</u> |
|---------------|--------------------|
| 614           | 105 – 304          |
| 509           | 146 – 401          |
| 309           | 130 – 235          |
| 306           | 105 – 235          |
| 305           | 105 – 235          |
| 304           | 130 – 207          |
| 219           | 322 – 401          |
| 214           | 130 – 235          |
| 205           | 197 – 235          |
| 204           | 197 – 235          |

Vimentin was identified in spots ranging in 10 kDa – 40 kDa. Based on the peptides identified in mass spectrometry data, a table including start and end positions of protein sequences is presented. These data suggest that these spots represent various fragments of vimentin.

**Supplementary Figure 2**

**Carbonic anhydrase 2**

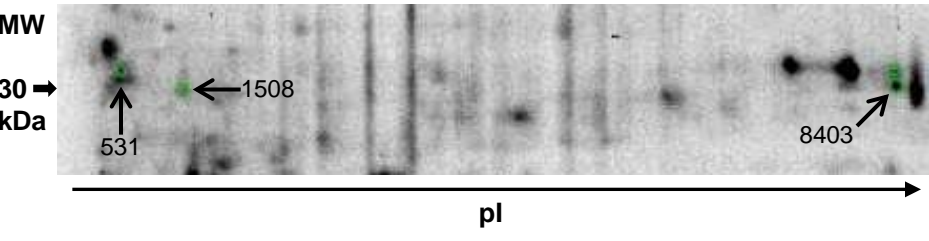

Carbonic anhydrase 2 was identified in protein spots 531, 1508, 7541 and 8403. These spots are present at similar MW but different pI, representing various isoforms of carbonic anhydrase 2.

**Supplementary Figure 3**

**Actin, gamma-enteric smooth muscle**

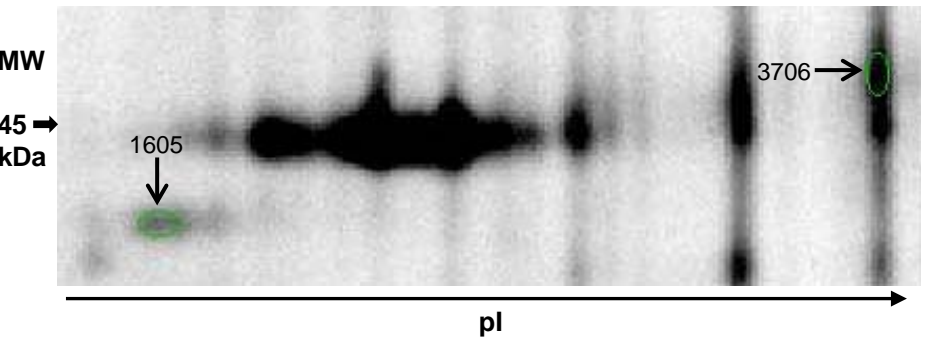

Two isoforms of actin were identified in spots 1605 and 3706.

Supplementary Figure 4

Total protein stained on nitrocellulose  
using MemCode reversible stain

Blot 1

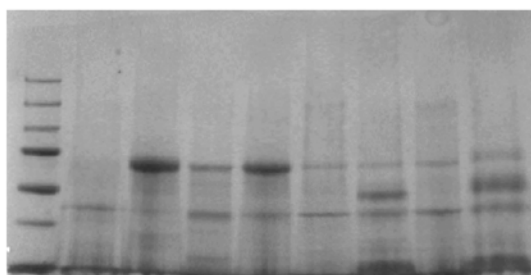

Blot 2

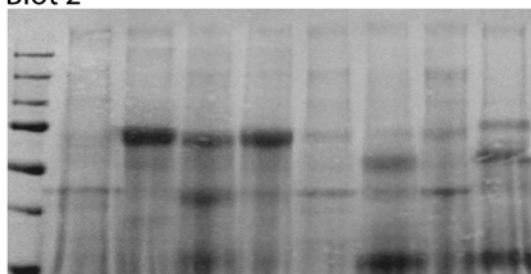

|         |   |         |   |          |   |          |   |            |
|---------|---|---------|---|----------|---|----------|---|------------|
| +       | - | +       | - | +        | - | +        | - | SVF        |
| -       | + | -       | + | -        | + | -        | + | Adipocytes |
| └───┘   |   | └───┘   |   | └───┘    |   | └───┘    |   | patient #  |
| L080404 |   | L070206 |   | L070622C |   | L070622P |   |            |
